# 1 **Engineering SARS-CoV-2 neutralizing antibodies for increased** 2 **potency and reduced viral escape**

## 3 **AUTHORS**

4 Fangzhu Zhao<sup>1,2,3,9</sup>, Celina Keating<sup>1,2,3,9</sup>, Gabriel Ozorowski<sup>2,3,5,9</sup>, Namir Shaabani<sup>1,9</sup>, Irene M.  
5 Francino-Urdaniz<sup>4</sup>, Shawn Barman<sup>1,2,3</sup>, Oliver Limbo<sup>2,6</sup>, Alison Burns<sup>1,2,3</sup>, Panpan Zhou<sup>1,2,3</sup>, Michael  
6 J. Ricciardi<sup>7</sup>, Jordan Woehl<sup>2,6</sup>, Quoc Tran<sup>2,6</sup>, Hannah L. Turner<sup>2,3,5</sup>, Linghang Peng<sup>1</sup>, Deli Huang<sup>1</sup>,  
7 David Nemazee<sup>1</sup>, Raiees Andrabi<sup>1,2,3</sup>, Devin Sok<sup>1,2,3,6</sup>, John R. Teijaro<sup>1</sup>, Timothy A. Whitehead<sup>4</sup>,  
8 Andrew B. Ward<sup>2,3,5</sup>, Dennis R. Burton<sup>1,2,3,8\*</sup>, Joseph G. Jardine<sup>2,6\*</sup>

## 9 10 **AFFILIATION**

11 <sup>1</sup>Department of Immunology and Microbiology, The Scripps Research Institute, La Jolla, CA 92037,  
12 USA

13 <sup>2</sup>IAVI Neutralizing Antibody Center, The Scripps Research Institute, La Jolla, CA 92037, USA

14 <sup>3</sup>Consortium for HIV/AIDS Vaccine Development (CHAVD), The Scripps Research Institute, La  
15 Jolla, CA 92037, USA

16 <sup>4</sup>Department of Chemical and Biological Engineering, University of Colorado, Boulder, CO 80305,  
17 USA

18 <sup>5</sup>Department of Integrative Structural and Computational Biology, The Scripps Research Institute,  
19 La Jolla, CA 92037, USA

20 <sup>6</sup>IAVI, New York, NY 10004, USA

21 <sup>7</sup>Department of Pathology, George Washington University, Washington, DC 20052, USA

22 <sup>8</sup>Ragon Institute of Massachusetts General Hospital, Massachusetts Institute of Technology, and  
23 Harvard University, Cambridge, MA 02139, USA

24 <sup>9</sup>These authors contributed equally

25 \*Correspondence: [burton@scripps.edu](mailto:burton@scripps.edu) (D.R.B.) and [jjardine@iavi.org](mailto:jjardine@iavi.org) (J.G.J.)

## 26 **ABSTRACT**

27 The rapid spread of SARS-CoV-2 variants poses a constant threat of escape from monoclonal  
28 antibody and vaccine countermeasures. Mutations in the ACE2 receptor binding site on the surface  
29 S protein have been shown to disrupt antibody binding and prevent viral neutralization. Here, we  
30 use a directed evolution-based approach to engineer three neutralizing antibodies for enhanced  
31 binding to S protein. The engineered antibodies showed increased *in vitro* functional activity in terms  
32 of neutralization potency and/or breadth of neutralization against viral variants. Deep mutational  
33 scanning revealed that higher binding affinity reduced the total number of viral escape mutations.  
34 Studies in the Syrian hamster model showed two examples where the affinity matured antibody  
35 provided superior protection compared to the parental antibody. These data suggest that  
36 monoclonal antibodies for anti-viral indications could benefit from *in vitro* affinity maturation to  
37 reduce viral escape pathways and appropriate affinity maturation in vaccine immunization could  
38 help resist viral variation.

## 39 INTRODUCTION

40 Over the last year and a half, severe acute respiratory syndrome coronavirus 2 (SARS-CoV-  
41 2) has had devastating consequences for global health and economies. Following the discovery of  
42 the disease, there was a rush to produce protective vaccines and therapeutics. Multiple highly  
43 effective vaccines have been developed that elicit immune responses against the SARS-CoV-2  
44 spike (S) trimer<sup>1</sup>. The protective mechanisms for the coronavirus disease 2019 (COVID-19)  
45 vaccines are still being deduced, however, several analyses have found that the elicitation of  
46 neutralizing antibodies (nAbs) correlates with protection<sup>2,3</sup>, a finding consistent with many other  
47 successful antiviral vaccines<sup>4</sup>. nAbs have been identified that target several distinct epitopes on the  
48 S trimer, but the majority of nAbs target the receptor binding domain (RBD)<sup>5,6</sup>. While vaccines are  
49 undisputedly the most effective strategy for control of COVID-19, recombinantly produced nAbs  
50 offer the potential to supplement prophylactic coverage in populations that respond poorly to  
51 vaccines, e.g. immunocompromised individuals, can be administered as a post-exposure  
52 prophylactic and can be used therapeutically to prevent hospitalization<sup>7,8</sup>.

53 One of the unique challenges in using a neutralizing monoclonal antibody (mAb) for antiviral  
54 indications is addressing existing viral diversity and the high mutational propensity in viruses that  
55 can give rise to resistant viral variants. Since the discovery of SARS-CoV-2 in 2019, thousands of  
56 viral variants containing synonymous and nonsynonymous mutations have been documented<sup>9</sup>. A  
57 growing number of these new variants (termed “Variants of Concern” or VOCs)<sup>10</sup> contain mutations  
58 that increase infectivity and/or allow viral escape from monoclonal nAbs elicited against the original  
59 SARS-CoV-2<sup>11-14</sup>. Several strategies are commonly used to mitigate the likelihood of viral escape  
60 from nAbs. Investigators often select antibodies that target functionally important and conserved  
61 regions, reducing the number of mutations that can allow viral escape without incurring a fitness  
62 cost<sup>15-17</sup>. It is also common to use cocktails of at least two nAbs targeting different epitopes, so  
63 multiple mutations are necessary for viral escape<sup>18-21</sup>. A third approach that is less well explored is  
64 to *in vitro* affinity mature the nAb against the target antigen to increase the binding affinity, helping  
65 to mitigate the impact of the viral mutations<sup>22</sup>. Here, we explore how increased binding affinity  
66 impacts the *in vitro* neutralization breadth and potency of three COVID-19 nAbs, CC12.1, CC6.30  
67 and CC6.33<sup>23</sup>, and how these affinity improvements impact the *in vivo* protective capability of these  
68 nAbs.

69

## 70 RESULTS

### 71 Structural analysis of nAbs CC6.30 and CC6.33

72 Previously, we reported the structure of nAb CC12.1, which binds to the RBS-A or Class 1  
73 epitope site and competes directly with angiotensin-converting enzyme 2 (ACE2)<sup>5,24,25</sup> but  
74 specificities of two other nAbs of interest, CC6.30 and CC6.33, were limited to epitope-binning  
75 data<sup>23</sup>. To better understand the molecular contacts of antibodies, we used cryoelectron microscopy  
76 (cryoEM) to solve the structures of two of the antibodies in complex with stabilized SARS-CoV-2 S  
77 trimers: 1) nAb CC6.30, which targets the RBS-B or Class 2 epitope site, binds RBD with an affinity  
78 of 1.7 nM (IgG format) and directly competes with ACE2, and 2) nAb CC6.33, which targets the  
79 Class 3 epitope site that is distinct from the ACE2 binding site and binds RBD with an affinity of 257  
80 nM (Fig.1 and Fig.2). Several clinical-stage nAbs also recognize these epitopes such as CB6/LY-  
81 CoV16 (RBS-A or Class 1)<sup>25,26</sup>, REGN10933 (RBS-B or Class 2)<sup>14,27</sup> and S309 (Class 3)<sup>5,28</sup>. In each  
82 complex, we used a stabilized, uncleaved Spike trimer (HPM7) based on the Wuhan strain  
83 containing 6 proline (hexaproline or HP) mutations<sup>29</sup> and an engineered interprotomer disulfide  
84 (mut7 or M7) between residues 705 and 883 of the S2 subunit. The global resolution of the two  
85 complexes was 3.6 Å (CC6.30/HPM7) and 3.3 Å (CC6.33/HPM7) and model building was assisted  
86 by local refinement maps of just the RBD and fragment antigen binding (Fab) variable region  
87 (Supplementary Fig.1,2, and Supplementary Table 1,2). Additionally, we solved the ligand-free  
88 structure of the HPM7 spike (2.8 Å and 3.0 Å resolution for C3 symmetric and asymmetric,  
89 respectively) (Supplementary Fig.2c,d and Supplementary Table 2).

90 CC6.30 straddles the SARS-CoV-2 RBD ridge (approximately residues 473-490) with  
91 contributions from all heavy chain (HC) and light chain (LC) complementarity determining regions  
92 (CDRs) except for LCDR2 (Fig.1a,b). The HCDR3 contains a disulfide bond (C99-C100d, Kabat  
93 numbering) that makes it more rigid, perhaps in turn acting to stabilize this more flexible region of  
94 the RBD around the “ACE2-binding ridge” (approximately Spike residue numbers 470-490)  
95 (Supplementary Fig.1b,c). Important interactions at the binding interface include hydrophobic  
96 packing of the RBD F490 side chain with antibody HC side chains I31, I52, I53 and I54  
97 (Supplementary Fig.1d), and predicted hydrogen bonding between the side chain of HCDR3 R97  
98 and both the RBD I492 backbone carbonyl and Q493 side chain (Supplementary Fig.1e). A salt  
99 bridge is formed between the side chains of RBD E484 and LCDR3 R96 (Fig.1c). This interaction  
100 is predicted to decrease the effectiveness of CC6.30 against certain VOCs, specifically Beta<sup>30</sup> and  
101 Gamma<sup>31</sup> VOCs, which contain an E484K mutation that abolishes the salt bridge and causes a  
102 possible charge-charge repulsion. Of similar concern, the L452 side chain of the RBD has  
103 hydrophobic interactions with HCDR1 I31 and HCDR2 I53 which would be incompatible with a long,  
104 positively-charged side chain that results from the L452R mutation found in the Delta variant<sup>32</sup>  
105 (Fig.1d).

106 CC6.30 appears to only bind the RBD-up state of the Spike (Fig.1a). While the ligand-free  
107 cryoEM structures of HPM7 spike reveal a 3 RBD-down conformation, our data suggest that the  
108 antibody is capable of shifting the equilibrium by capturing RBD in the up conformation. The most  
109 stable cryoEM reconstruction contains 2 up RBDs, each bound by CC6.30, while the unoccupied  
110 RBD remains in the down position (Fig.1a). Superposition of the RBD:CC6.30 portion of the model  
111 onto the all-down RBD ligand-free structure predicts that clashes would occur between HCDR3 and  
112 the RBD and N343 glycan from an adjacent protomer (Supplementary Fig.1f). Finally, E484 is a  
113 major part of the epitope as defined in the Class 2 or RBS-B nomenclatures<sup>14</sup>, consistent with our  
114 other observations for CC6.30.

115 CC6.33 binds a non-overlapping epitope to that of CC6.30, with the heavy and light chain  
116 interface centered on the N343 glycan (Supplementary Fig.2a,b). In contrast to CC6.30, this nAb  
117 binds the RBD-down conformation and the most stable reconstruction has 2 down RBDs bound by  
118 the antibody, while the third RBD is in the up position (Fig.2a). Indeed, the binding of CC6.33 to a  
119 down RBD requires slight opening of the apex to relieve a clash with the RBD ridge of the adjacent  
120 protomer, and is likely the driving force for the unoccupied RBD shifting to the up position after the  
121 binding of two Fabs (Supplementary Fig.2e). While modeling suggests that CC6.33 should be able  
122 to bind an up RBD, we did not observe this in our dataset, possibly due to the HPM7 spike design  
123 preferentially displaying 3 down-RBDs (Supplementary Fig.2f). Also, portions of HC framework  
124 regions 1 (HFR1) and HFR3 contact the RBD ridge of the neighboring protomer (still in the down  
125 position) in a manner that mimics the interaction between the unoccupied up-RBD and an adjacent  
126 RBD-down ridge, further stabilizing the interaction between antibody and spike (Fig.2c,d). Binding  
127 of CC6.33 to its epitope is largely governed by hydrophobic interactions involving the HC, including  
128 HCDR2 residues I52, I53 and L54 packing against RBD residues L335, V362 and P527  
129 (Supplementary Fig.2g). HCDR3 W98 reaches into an aromatic pocket lined with RBD residues  
130 F338, F342, A363, Y365 and L368, while also donating a hydrogen bond to the backbone carbonyl  
131 of D364 (Supplementary Fig.2h). Fewer hydrogen bonds are predicted between RBD and CC6.33  
132 compared to CC6.30. Those contributed by CC6.33 often involve bonds to RBD main chain atoms  
133 (e.g. HCDR3 Q97 with RBD backbone C336, V362 and D364), making such interactions less  
134 susceptible to changes in side chains resulting from VOC mutations (Supplementary Fig.2i). The  
135 antibody epitope itself is largely positioned away from the common RBD mutations that could affect  
136 binding, a property shared with other Class 3 RBD antibodies (Fig.2d). Lastly, the LC is mostly  
137 involved via LCDR2 packing against and providing hydrogen bonds to the viral N343 glycan, and a  
138 single peptide-peptide hydrogen bond between the side chains of LCDR1 Y32 and RBD E340  
139 (Fig.2b and Supplementary Fig.2j).

## 140 **Engineering higher affinity SARS-CoV-2 antibodies**

141 Affinity maturation of CC12.1, CC6.30 and CC6.33 was achieved using our rapid affinity  
142 maturation strategy, SAMPLER<sup>33</sup>. Briefly, HC and LC libraries were synthesized containing one

143 mutation per CDR loop from the starting sequence, for up to three mutations per chain. Potential  
144 liabilities were informatically filtered from the library process and an N-linked glycan on LCDR1 of  
145 CC6.30 was removed by an N28S mutation, reverting that position to the original amino acid found  
146 in the germline VK1-39 gene segment so that any improved CC6.30 variant would not contain that  
147 glycan. The HC and LC libraries were displayed on the surface of yeast and iterative rounds of  
148 selections were used to enrich for clones with higher affinity for SARS-CoV-2 RBD (for CC12.1 and  
149 CC6.30 libraries) or S protein (for the CC6.33 library). The sort process also included a round of  
150 negative selection, where clones with low binding to a polyclonal preparation of detergent-  
151 solubilized HEK293 cell membrane proteins were enriched to remove polyreactive variants. The  
152 enriched clones were then combined into a heavy/light combinatorial library and screened again  
153 with the same four-round selection strategy to identify the optimal heavy/light pairs<sup>33</sup>. At the  
154 conclusion of the selection process, sequences of the antibodies were recovered and 12 improved  
155 variants of each antibody were selected to be reformatted and expressed as IgG for  
156 characterization.

157 All enhanced (e) eCC12.1, eCC6.30 and eCC6.33 variants bound SARS-CoV-2 RBD with  
158 higher affinity than the parental antibodies, with an average 45-fold (5- to 267-fold) increase in  
159 monovalent equilibrium dissociation constants (Fig.3a) measured by surface plasmon resonance  
160 (SPR). In nearly all cases, the affinity gains came through a reduction in the dissociation rate  
161 (Supplementary Table 3). The binding affinity for monomeric RBD is notably lower for CC6.33  
162 compared to CC12.1, CC6.30 (Fig.3a) and the majority of other antibodies isolated from our COVID-  
163 19 cohort<sup>23</sup>. The binding affinity of CC6.33 Fab for S protein is approximately 10-fold higher than  
164 for RBD, suggesting that the CC6.33 epitope is poorly formed on monomeric RBD and/or differential  
165 processing of the N343 glycan affects mAb binding. ELISA binding to SARS-CoV-2 RBD and S by  
166 CC12.1 and CC6.30 parental and engineered nAbs (enAbs) was comparable, however, a large  
167 improvement in neutralization EC<sub>50</sub> and the maximum neutralization plateau was observed for  
168 eCC6.33 variants compared to the CC6.33 parental (Supplementary Fig.3). The enAb variants were  
169 evaluated by analytical size exclusion chromatography and found to be monodispersed with similar  
170 column retention time to our clinical controls (Supplementary Fig.4). None of the eCC12.1 or  
171 eCC6.33 variants bound to antigens in our polyreactivity panel (Chinese hamster ovary cell  
172 solubilized membrane proteins, single-stranded DNA, and human insulin) or stained HEp2 epithelial  
173 cells (Supplementary Fig.5). Several of the CC6.30 variants showed low levels of binding to one or  
174 more of the antigens in our polyreactivity panel or stained HEp2 cells, but the majority of engineered  
175 variants were negative in all assays, highlighting the importance of expressing and validating  
176 multiple variants.

177

## 178 **Neutralizing activity of engineered antibodies**

179 The parental and engineered nAbs were tested for *in vitro* neutralization of SARS-CoV-1  
180 and SARS-CoV-2 pseudotyped viruses<sup>23</sup> to investigate the relationship between improved binding  
181 affinity and *in vitro* neutralization potency. The results were different for the 3 antibodies. All

182 eCC6.33 variants showed improved neutralization potency, with the IC<sub>50</sub> improving from 228 ng/mL  
183 to around 10 ng/mL for SARS-CoV-2 (Fig.3b) and from 2.27 µg/mL to around 20 ng/mL for SARS-  
184 CoV-1. All eCC6.33 variants achieved 100% inhibition while the parental CC6.33 had a maximum  
185 percent neutralization (MPN) of only around 80% (Supplementary Table 3). In stark contrast and  
186 despite comparable affinity improvements to eCC6.33 variants, eCC12.1 and eCC6.30 variants  
187 showed no significant improvement in neutralization potency relative to the parent Abs. To further  
188 investigate, we produced the parental and engineered nAbs as molecular Fabs to evaluate  
189 neutralization in a monovalent format. In all cases the engineered Fabs neutralized more potently  
190 than the parental Fabs, with parental CC12.1 and CC6.33 Fabs failing to neutralize at  
191 concentrations of 50 µg/mL (Fig.3c-e). As a control, we also tested our enAbs against authentic  
192 SARS-CoV-2 and observed similar neutralization activity to the pseudotyped virus (Fig.3f),  
193 consistent with our previous observations. Taken together, this data suggest that, in this system,  
194 increases in binding affinity translate to increases in the *in vitro* neutralization potency until a  
195 “threshold” IC<sub>50</sub> around 10 ng/mL is reached, at which point further increases in binding affinity do  
196 not appear to affect the *in vitro* neutralization function of the antibody. Furthermore, this apparent  
197 affinity required to reach this neutralization threshold is lowered by the bivalent binding of an IgG.  
198 However, a Fab can neutralize the virus provided the monovalent affinity is sufficiently high,  
199 indicating inter- or intra- spike cross linking may help but is not necessary for these nAbs to  
200 neutralize (Fig.3c and Fig.3e).

201 We next sought to investigate how the evolving viral diversity of SARS-CoV-2 variants  
202 impacts the binding and the neutralization function of our parental and select engineered nAbs. We  
203 first measured the neutralization potency of our nAbs against VOCs with full-spike mutations  
204 including Alpha (B.1.1.7, originating in UK), Beta (B.1.351, originating in South Africa)<sup>30</sup>, Gamma  
205 (P.1, originating in Brazil)<sup>31</sup>, Kappa (B.1.617.1, originating in India) and Delta (B.1.617.2, originating  
206 in India)<sup>32,34</sup> variants as well as single mutations on RBD (Fig.4a).

207 CC12.1 neutralized Alpha, Delta and Kappa VOCs with an IC<sub>50</sub> comparable to Wuhan-1  
208 virus, however, Beta and Gamma VOCs completely escaped from this nAb (Fig.4b,c). Analysis of  
209 the individual variants found that K417N (from Beta VOC) and K417T (from Gamma VOC) facilitated  
210 this escape, consistent with the previous observation that most VH3-53-class nAbs are sensitive to  
211 these mutations<sup>14,35,36</sup>. K417 falls in the middle of the CC12.1 crystallographically defined epitope  
212 and makes hydrogen bonding or packing interactions with heavy chain residues H33, Y52, D95 and  
213 D97, as well as light chain residues N92 and K97<sup>24</sup>. Importantly, eCC12.1.4 and eCC12.1.7  
214 neutralized all the VOCs, including Beta and Delta containing the K417N/T mutations (Fig.4c). We  
215 measured neutralization of all 12 eCC12.1 antibodies against Beta and Gamma as well as the single  
216 mutation variants, where we found 11 out of 12 mAbs neutralized the Gamma lineage and 9 out of  
217 12 neutralized the Beta lineage (Supplementary Fig.6a). Mutational analysis of the 9 enAbs that  
218 reacted against both VOCs found a broad assortment of mutations that had been selected across  
219 the different antibodies (Supplementary Fig.6a), suggesting that there are multiple ways to  
220 compensate for the loss of the K417 interaction.

221 CC6.30 and eCC6.30.2 were effective against the Alpha variant, showed significantly  
222 reduced function against the Delta variant and were completely unable to neutralize the Beta,  
223 Gamma or Kappa variants (Fig.4b,c). When tested against pseudoviruses containing the individual  
224 mutations found in these variants, CC6.30 showed complete loss of neutralization against the single  
225 L452R, E484K and E484Q variants. eCC6.30.2 retained modest functionality against L452R and  
226 E484Q, while the E484K variant still facilitated complete viral escape. This data was consistent with  
227 our structural analysis, with both E484 and L452 making extensive interactions with CC6.30  
228 (Fig.1c,d).

229 The parental CC6.33 and eCC6.33.8 were effective at neutralizing all VOCs tested with  
230 similar  $IC_{50}$ s to the original Wuhan-1 SARS-CoV-2, consistent with the observation that CC6.33  
231 recognizes the conserved class 3 epitope<sup>5,28</sup> distal from the mutations in these viruses (Fig.2b,  
232 Fig.4b,c, and Supplementary Fig.6b). REGN10987, another class 3 antibody<sup>5,27</sup> retained similar  
233 potency for all VOCs tested (Supplementary Fig.6b).

234 To systematically investigate the relationship between binding affinity and neutralization for  
235 VOCs across our collection of parental and engineered nAbs, a panel of monomeric RBD variants  
236 were expressed for SPR analysis. Overall, the RBD binding affinities and the off-rate correlated well  
237 with the *in vitro* neutralization data (Fig.4d-f). Mutations that completely abrogated neutralization  
238 usually showed a complete loss of binding by SPR or weak reactivity that could not be fit to a simple  
239 kinetics model. Of particular note were the Beta and Gamma RBDs binding to the CC12.1 variants.  
240 Parental CC12.1 bound Wuhan-1 RBD with an affinity of 6 nM, and had a complete loss of both  
241 binding and neutralization to both Beta and Gamma RBDs. In contrast, affinity matured eCC12.1.4  
242 bound Wuhan-1 with an affinity of 286 pM, and although the mutations in Beta and Gamma reduced  
243 binding affinity by 182- fold and 43- fold (Supplementary Table 4), respectively, eCC12.1.4 was still  
244 able to neutralize both VOCs (Fig.4c). These data indicate that enhanced nAb affinity for the target  
245 antigen helps to offset the affinity losses resulting from viral mutations within the nAb paratope,  
246 allowing the nAb to maintain sufficient affinity for neutralization.

247

## 248 **Mapping RBD escape mutations for CC12.1 and eCC12.1.4**

249 We next asked whether engineering high affinity nAbs reduces the pathways for viral escape  
250 compared with the parental nAbs or if they simply shifted the escape mutations to other positions.  
251 Deep mutational scanning libraries of RBD were generated and used to determine the mutations  
252 on RBD that prevented CC12.1 and eCC12.1.4 from blocking ACE2 binding *in vitro* (Supplementary  
253 Fig.7a)<sup>36</sup>. 94.5% (2250/2380) of all possible single mutations were scanned (Supplementary Table  
254 5). Consistent with previous reports<sup>36</sup> and our neutralization screening, CC12.1 is vulnerable to  
255 multiple mutations at K417 with a false discovery rate (FDR) below 0.1 for K417N/T but eCC12.1.4  
256 is able to accommodate all mutations at K417 (Fig.5a,b, and Supplementary Fig.7b). We also  
257 detected multiple mutations at position D420 and N460 that confer escape from the parental CC12.1



258 (Fig.5a,b). Alanine scanning and pseudovirus escape mutations had identified these D420 and  
259 N460 residues as important for public VH3-53 SARS-CoV-2 antibodies<sup>35,37,38</sup>, but structural analysis  
260 shows these two positions on the periphery of the CC12.1 epitope and making relatively insignificant  
261 contacts to the antibody (Fig.5c,d).

262 Pseudoviruses containing the individual D420K, N460H, N460P, and N460A mutations,  
263 identified as potential escape mutations in the deep mutational scanning, were produced and  
264 evaluated to determine if parental CC12.1 and several eCC12.1 variants were sensitive to these  
265 mutations in a neutralization assay. In agreement with RBD library screening, a D420K substitution  
266 completely disrupted CC12.1 neutralization, while substitutions at the N460 residue significantly  
267 decreased its neutralization potency by 12- to 246-fold (Fig.5e-g). By contrast, although D420K and  
268 N460H were identified as potential escape mutations against eCC12.1.4, neutralization potency  
269 was reduced by a more modest 8-fold against D420K and remained insensitive to a N460H  
270 substitution (Fig.5d,f). These data suggest that increasing the affinity of SARS-CoV-2 nAbs restricts  
271 the potential escape mutations that can arise in RBD, rather than just altering the critical nAb  
272 contacts and shifting the escape mutations to a comparable number of different positions and/or  
273 mutations. This is particularly important in the context of developing antiviral antibodies where viral  
274 escape is a serious and constant threat.

## 275 **In vivo protection**

276 *In vitro* analysis of the enAbs suggested that the increased affinity provided functional  
277 improvements for two of the three candidates. eCC12.1 variants were better able to overcome  
278 mutations that are emerging in the VOCs and eCC6.33 variants had increased neutralization  
279 potency and higher MPN compared to CC6.33. The improvements to CC6.30 were less clear cut  
280 and the parental antibody was found to have poor pharmacokinetics in hamsters and so was not  
281 pursued further *in vivo* (data not shown). A series of experiments were designed to compare  
282 parental and engineered nAbs in the Golden hamster model of COVID-19 infection. The  
283 experimental design for passive transfer studies is shown in Fig.6a. Groups of six hamsters were  
284 prophylactically treated with serially diluted doses of antibody starting at 2 mg per animal to 8 µg  
285 per animal via intraperitoneal (i.p.) injection 72 hours before intranasal challenge with SARS-CoV-  
286 2 at a dose of  $1 \times 10^5$  plaque-forming units (PFU). A group receiving 2 mg doses of an irrelevant  
287 human mAb against dengue virus (Den3) was used as a control for each experiment. All hamsters  
288 were monitored daily for weight loss as a measure of disease<sup>39</sup> and serum was collected from each  
289 animal to determine antibody titer at the time of viral challenge (D0) compared to the time of sacrifice  
290 (D7) (Fig.6b). Hamsters have been shown to clear SARS-CoV-2 infection after 7 days, so a replicate  
291 of the original experiment was performed in which the groups of hamsters were euthanized four  
292 days post infection (D4) and lung tissue was collected to quantify lung viral titers. In addition to  
293 collecting serum at D0 and D7 to measure nAb titers, the half-life of the parental and several  
294 engineered versions were assessed to try to find engineered nAbs that closely matched the

295 bioavailability of the parental versions to allow a comparison of the two. Ultimately, eCC6.33.3 and  
296 eCC12.1.6 were selected to compare to the parental nAbs.

297 We first tested the ability of CC12.1 and eCC12.1.6 to protect against challenge from the  
298 Beta VOC, as the *in vitro* data showed that eCC12.1.6 effectively neutralized the variant  
299 (Supplementary Fig.6b). The prophylactic protection experiment described above was done using  
300 Beta (20H/501Y.V2) SARS-CoV-2. Consistent with our *in vitro* neutralization data, eCC12.1.6  
301 exhibited a dose-dependent protective response both in terms of weight loss and lung viral titers  
302 (Fig.6c-e). Parental CC12.1 showed no protection compared to the Den3 control group. We also  
303 assessed eCC12.1.6 against the original SARS-CoV-2 (USA/WA1/2020) using the same groups  
304 (Supplementary Fig.8) and the weight loss trend was nearly identical to that of the Beta variant,  
305 albeit the Beta variant showed a lower overall percentage of weight loss (Supplementary Fig.8e).

306 The second protection experiment was designed to test whether the increased *in vitro*  
307 neutralization potency and maximum neutralization percentage of eCC6.33.3 relative to the  
308 parental nAb provided enhanced protection. CC6.33 (*in vitro* IC<sub>50</sub> = 0.228 µg/mL and MPN of 81%)  
309 was compared with eCC6.33.3 (*in vitro* IC<sub>50</sub> = 0.008 µg/mL and MPN of 100%) for protective efficacy  
310 against challenge from the original SARS-CoV-2 (USA/WA1/2020) (Supplementary Fig.9).  
311 Following viral challenge, animals that received either the parental or engineered nAb, including the  
312 groups that received the 8 µg dose, showed a statistically significant reduction in weight loss  
313 compared to the group receiving the Den3 (Fig.6f,g). The protection from weight loss correlated  
314 with the amount of nAb the animals received, and there was no apparent difference in efficacy  
315 between the parental and engineered nAbs. However, in contrast to the weight loss results, the  
316 enAbs showed superior ability to control viremia in the lung (Fig.6h). Animals that received the 2  
317 mg dose of eCC6.33.3 had sterilizing immunity and the animals that received 500 µg dose of  
318 eCC6.33.3 had lung viral titers 5 logs lower than the Den3 control group. Animals that received the  
319 parental CC6.33 had viral titers only 2 logs lower than the Den3 group, protection that was  
320 comparable to the group receiving 125 µg of eCC6.33.3. It is unclear why there is a disconnect  
321 between lung viral titers and weight loss, however, eCC6.33.3 was clearly superior at controlling  
322 lung viral load. Broadly, the two experiments confirm that the affinity engineering of these nAbs  
323 provide a superior *in vivo* benefit predicted from *in vitro* analysis.

## 324 **Neutralization of the Omicron variant**

325 During the preparation of this manuscript the Omicron VOC was reported. The VOCs  
326 characterized above contained 7 to 12 mutations in S compared to the original SARS-CoV-2, and  
327 at most contained 3 mutations in RBD (Beta and Gamma). In contrast, Omicron contains 30  
328 mutations, 3 deletions and an insertion in S, with 15 of these mutations located in the RBD. The  
329 mutations in RBD are heavily concentrated across the class I, class II and class III neutralizing  
330 antibody epitopes and have been shown to reduce the neutralization efficacy of plasma from

331 vaccinated and/or infected donors<sup>40-43</sup>. They also confer resistance or complete escape from the  
332 majority of clinical antibody candidates<sup>43</sup>.

333       Omicron completely escaped from the parental CC6.30 and all the eCC6.30 variants  
334 (Supplementary Fig.10). This was largely consistent with data from other VOCs demonstrating the  
335 importance of the E484 interaction for this antibody family. Omicron not only contains an E484A  
336 mutation, but also contains a Q493K mutation that removes a hydrogen bond between Q493 and  
337 R97<sub>H</sub> on CC6.30 variants. Similarly, the parental CC6.33 and all eCC6.33 variants were also unable  
338 to neutralize Omicron (Supplementary Fig.10). This observation was more unexpected. The only  
339 Omicron mutation immediately within the CC6.33 epitope is G339D that may introduce a clash with  
340 the CC6.33 CDRH3 backbone. Omicron also contains mutations S371L, S373P and S375F that  
341 could alter the conformation of an adjacent loop and prevent the N343 glycan from adopting the  
342 conformation observed in the CC6.33 bound structure. Finally, we observed that Omicron was  
343 resistant to parental CC12.1 and 11 of 12 eCC12.1 variants, however, eCC12.1.6 retained  
344 neutralizing activity against Omicron (IC<sub>50</sub> of 0.20 µg/mL), albeit with approximately 25-fold reduced  
345 potency (Fig.7a, and Supplementary Fig.10). eCC12.1.6 was also the most effective antibody  
346 against Beta and Gamma VOCs, with comparable potency to the Wuhan-1 strain (Fig.7a). Analysis  
347 of the selected mutations in eCC12.1.6 compared to other eCC12.1 variants did find a unique S31W  
348 mutation in LCDR2 that is located in close proximity to the N501Y mutation in all VOCs as well as  
349 G466S, G496S, Q498R and Y505H that are present in Omicron (Fig.7b). It is also possible that the  
350 other mutations in the antibody that do not interact directly with RBD stabilize the CDR loops in a  
351 conformation that happened to be slightly more compatible with Omicron compared to the other  
352 eCC12.1 variants.

353

## 354 **DISCUSSION**

355       Emerging SARS-CoV-2 VOCs have challenged vaccine-induced immunity and therapeutic  
356 mAbs, and functional nAbs with prophylactic and therapeutic efficacy against VOCs are desired. To  
357 this end, investigators have searched for nAbs that are largely resistant to viral antigenic variability  
358 by screening for nAbs that broadly neutralize SARS-CoV-2 VOCs and/or other sarbecoviruses. This  
359 effort has largely paralleled the work to identify broadly neutralizing HIV or influenza antibodies that  
360 target conserved epitopes on these antigenically variable viruses<sup>44,45</sup>. Here, we explored an  
361 alternative and complementary strategy of engineering nAbs to have higher affinity for their target  
362 antigen through directed evolution and then investigated the relationship between binding affinity,  
363 *in vitro* neutralization potency and *in vivo* efficacy. Broadly, we found that monovalent binding affinity  
364 and *in vitro* neutralization potency are correlated, until the *in vitro* neutralization IC<sub>50</sub> reaches a  
365 “threshold” (around 10 ng/mL for IgG) after which further affinity improvements did not translate to  
366 improvements in neutralization potency, at least for CC12.1 and CC6.30 nAbs that directly compete  
367 with ACE2 binding to the RBD. These affinity improvements do help to expand the breadth of

368 antibody reactivity, allowing them to better neutralize VOCs that contain mutations in and around  
369 the antibody epitope. This was particularly evident with the eCC12.1 variants that are part of the  
370 shared VH3-53 lineage nAbs and are broadly susceptible to the K417T/N mutations found in Beta  
371 and Gamma VOCs<sup>14,36</sup>. These mutations abrogated binding of the parental CC12.1 nAb, much like  
372 other reported VH3-53 nAbs; however, the higher affinity of the eCC12.1 variants for wild-type S-  
373 protein was able to compensate for lost the K417 contact allowing the nAb to maintain sufficient  
374 affinity that it could still potently neutralize the VOCs. Of note, eCC12.1 variants were affinity  
375 matured against the original SARS-CoV-2 RBD sequence and had no specific selective pressure  
376 to accommodate mutations in the VOCs. Importantly, our saturated mutagenesis screening showed  
377 that the affinity maturation restricted the number of potential escape mutations rather than just  
378 altering them to different positions. While increasing the affinity could restrict escape mutations, it  
379 did not abrogate them entirely, as eCC12.1 variants showed modest sensitivity to the D420K  
380 mutation, and all eCC6.30 variants were still unable to bind or neutralize Beta and Gamma VOCs  
381 with the E484K mutation. In the extreme case of the Omicron variant that contains so many  
382 mutations on the RBD, especially within the footprint of class 1 antibodies, there was still one  
383 CC12.1 variant that had significant neutralizing activity. This finding illustrates the value of affinity  
384 maturation in the context of natural infection in that the generation of a diverse set of related  
385 antibodies, as was done here *in vitro*, will likely generate some antibodies able to bind to and act  
386 against many different viral variants, including those with multiple mutations as for Omicron (and  
387 see below). It is possible that part of the reason so many clinical antibody candidates failed against  
388 Omicron is that most were selected shortly after COVID infection before much affinity maturation  
389 had occurred<sup>46</sup>.

390 The engineering of higher affinity enAbs also improved protective efficacy *in vivo*. The  
391 protection data also show that eCC12.1.6 was effective at preventing infection from the Beta variant  
392 while CC12.1 was not, consistent with the *in vitro* neutralization results. eCC6.33.3 provided  
393 significantly enhanced viral control with sterilizing immunity at the 2 mg dose and ~100,000 fold  
394 reduction in lung viral titers at the 500 µg dose compared to the Den3 control. A plausible  
395 explanation for this enhanced control is the improvement in neutralization plateau—CC6.33 only  
396 achieves ~80% MPN whereas eCC6.33 variants plateau at 100% neutralization. While the results  
397 were expected, it was important to formally demonstrate that the affinity/neutralization  
398 improvements translated to enhanced protection *in vivo*. We also note that, while not the objective  
399 of the experiment, the engineering produces a broad spectrum of related nAbs with different  
400 biochemical properties and this resulted in an eCC6.30 variant with significantly better  
401 pharmacokinetics compared to the parental CC6.30. Taken together, this data strongly suggests  
402 the benefit of engineering anti-viral nAbs for improved affinity to their target antigen, with an  
403 important benefit being the restriction of potential escape pathways for the virus.

404 The data also emphasizes the importance of affinity maturation in vaccine-induced  
405 responses to maximize the opportunities for protection against viral variants. Longitudinal studies  
406 have shown that mAbs isolated from later time points have more somatic mutation compared to

407 clonally related variants from earlier time points, and this additional somatic mutation can increase  
408 affinity, potency and expand breadth<sup>38,47</sup>. The enAb selections demonstrated that there are  
409 numerous solutions from a single starting point that can produce antibodies with increased binding  
410 affinity (Supplementary Table 3). This situation is similar to a vaccine-expanded B cell lineage, that  
411 undergoes slightly different maturation trajectories. Despite achieving similar final results against  
412 the target antigen, the different members within the expanded lineage can have different levels of  
413 cross-reactivity to viral variants. We also note that the binding kinetics of our enAbs are consistent  
414 with what can be achieved through multiple vaccinations with a soluble protein antigen<sup>48</sup>. These  
415 data support the current approach of boosting with the original SARS-CoV-2 vaccine formulation,  
416 as continued expansion of B cell lineages and further improvements in affinity can help expand the  
417 response to cover new VOCs. It also will help to expand the pool of memory B cells that may be  
418 cross-reactive to new vaccine formulations when they are eventually developed.

419 In summary, we demonstrate that increasing antibody affinity can result in improved  
420 neutralization breadth and potency, and these improvements can enhance the therapeutic antibody  
421 function.

## 422 **ACKNOWLEDGEMENTS**

423 Research reported in this publication was supported by the National Institute of Allergy and  
424 Infectious Diseases of the National Institutes of Health under Award Number R01AI141452 to  
425 T.A.W. This work was supported by NIH CHAVD UM1 AI44462 (D.R.B.), the IAVI Neutralizing  
426 Antibody Center, the Bill and Melinda Gates Foundation OPP1170236 and INV-004923 (D.R.B.,  
427 A.B.W.), and the James B. Pendleton Charitable Trust (D.R.B.).

## 428 **AUTHOR CONTRIBUTIONS**

429 F.Z. and J.G.J. conceived and designed the study. F.Z. and S.B. performed yeast library  
430 preparation, yeast cell staining, sorting, sequencing, and cloning experiments. F.Z., S.B., A.B., and  
431 O.L. expressed and purified the monoclonal antibodies. G.O., and H.T. performed Cryo-EM sample  
432 preparation, imaging, data processing and model building. F.Z., S.B., and A.B. characterized  
433 monoclonal antibodies in functional assays and biophysical analysis. A.B. and O.L. generated  
434 mutant RBD protein plasmids and expressed recombinant RBD and S proteins. J.W. performed  
435 surface plasmon resonance experiment and analysis. A.B., S.B., P.Z. and L.P. generated  
436 pseudovirus mutant constructs, produced pseudovirus and performed neutralization assay. I.F.U  
437 and T.A.W. generated RBD mutant library, analyzed and identified escaped mutants. C.K. and N.S.  
438 performed hamster protection experiments including antibody infusion, virus challenge, weight  
439 analysis, viral load measurement. F.Z., C.K., G.O., D.R.B., and J.G.J. wrote the manuscript and all  
440 authors reviewed and edited the manuscript.

441

## 442 **DECLARATION OF INTEREST**

443 J.G.J., D.R.B., and F.Z. are listed as inventors on pending patent applications describing the  
444 engineered SARS-CoV-2 neutralizing antibodies.

445

## 446 **REFERENCES**

- 447 1. Creech, C. B., Buddy Creech, C., Walker, S. C. & Samuels, R. J. SARS-CoV-2 Vaccines.  
448 *JAMA* vol. 325 1318 (2021).
- 449 2. Feng, S. *et al.* Correlates of protection against symptomatic and asymptomatic SARS-CoV-2  
450 infection. *Nat. Med.* (2021) doi:10.1038/s41591-021-01540-1.
- 451 3. McMahan, K. *et al.* Correlates of protection against SARS-CoV-2 in rhesus macaques.  
452 *Nature* **590**, 630–634 (2021).
- 453 4. Plotkin, S. A. Correlates of Protection Induced by Vaccination. *Clinical and Vaccine*  
454 *Immunology* vol. 17 1055–1065 (2010).
- 455 5. Barnes, C. O. *et al.* SARS-CoV-2 neutralizing antibody structures inform therapeutic  
456 strategies. *Nature* **588**, 682–687 (2020).
- 457 6. Piccoli, L. *et al.* Mapping Neutralizing and Immunodominant Sites on the SARS-CoV-2 Spike  
458 Receptor-Binding Domain by Structure-Guided High-Resolution Serology. *Cell* **183**, 1024–  
459 1042.e21 (2020).
- 460 7. Weinreich, D. M. *et al.* REGN-COV2, a Neutralizing Antibody Cocktail, in Outpatients with  
461 Covid-19. *N. Engl. J. Med.* **384**, 238–251 (2021).
- 462 8. Copin, R. *et al.* The monoclonal antibody combination REGEN-COV protects against SARS-  
463 CoV-2 mutational escape in preclinical and human studies. *Cell* **184**, 3949–3961.e11 (2021).
- 464 9. <https://nextstrain.org/ncov/gisaid/global>.
- 465 10. CDC. SARS-CoV-2 Variant Classifications and Definitions.  
466 <https://www.cdc.gov/coronavirus/2019-ncov/variants/variant-classifications.html> (2021).
- 467 11. Wang, P. *et al.* Increased resistance of SARS-CoV-2 variant P.1 to antibody neutralization.  
468 *Cell Host Microbe* **29**, 747–751.e4 (2021).
- 469 12. Wang, P. *et al.* Antibody resistance of SARS-CoV-2 variants B.1.351 and B.1.1.7. *Nature*  
470 **593**, 130–135 (2021).
- 471 13. Wibmer, C. K. *et al.* SARS-CoV-2 501Y.V2 escapes neutralization by South African COVID-  
472 19 donor plasma. *Nat. Med.* **27**, 622–625 (2021).
- 473 14. Yuan, M. *et al.* Structural and functional ramifications of antigenic drift in recent SARS-CoV-2  
474 variants. *Science* **373**, 818–823 (2021).
- 475 15. Liu, H. *et al.* Cross-Neutralization of a SARS-CoV-2 Antibody to a Functionally Conserved  
476 Site Is Mediated by Avidity. *Immunity* **53**, 1272–1280.e5 (2020).
- 477 16. Li, D. *et al.* In vitro and in vivo functions of SARS-CoV-2 infection-enhancing and neutralizing  
478 antibodies. *Cell* **184**, 4203–4219.e32 (2021).

- 479 17. Fedry, J. *et al.* Structural insights into the cross-neutralization of SARS-CoV and SARS-CoV-  
480 2 by the human monoclonal antibody 47D11. *Sci Adv* **7**, (2021).
- 481 18. Julg, B. *et al.* Protection against a mixed SHIV challenge by a broadly neutralizing antibody  
482 cocktail. *Sci. Transl. Med.* **9**, (2017).
- 483 19. Xu, L. *et al.* Trispecific broadly neutralizing HIV antibodies mediate potent SHIV protection in  
484 macaques. *Science* **358**, 85–90 (2017).
- 485 20. Starr, T. N. *et al.* Prospective mapping of viral mutations that escape antibodies used to treat  
486 COVID-19. *Science* **371**, 850–854 (2021).
- 487 21. Starr, T. N., Greaney, A. J., Dingens, A. S. & Bloom, J. D. Complete map of SARS-CoV-2  
488 RBD mutations that escape the monoclonal antibody LY-CoV555 and its cocktail with LY-  
489 CoV016. *Cell Rep Med* **2**, 100255 (2021).
- 490 22. Rappazzo, C. G. *et al.* Broad and potent activity against SARS-like viruses by an engineered  
491 human monoclonal antibody. *Science* **371**, 823–829 (2021).
- 492 23. Rogers, T. F. *et al.* Isolation of potent SARS-CoV-2 neutralizing antibodies and protection  
493 from disease in a small animal model. *Science* **369**, 956–963 (2020).
- 494 24. Yuan, M. *et al.* Structural basis of a shared antibody response to SARS-CoV-2. *Science* **369**,  
495 1119–1123 (2020).
- 496 25. Yuan, M., Liu, H., Wu, N. C. & Wilson, I. A. Recognition of the SARS-CoV-2 receptor binding  
497 domain by neutralizing antibodies. *Biochemical and Biophysical Research Communications*  
498 vol. 538 192–203 (2021).
- 499 26. Shi, R. *et al.* A human neutralizing antibody targets the receptor-binding site of SARS-CoV-2.  
500 *Nature* **584**, 120–124 (2020).
- 501 27. Hansen, J. *et al.* Studies in humanized mice and convalescent humans yield a SARS-CoV-2  
502 antibody cocktail. *Science* **369**, 1010–1014 (2020).
- 503 28. Pinto, D. *et al.* Cross-neutralization of SARS-CoV-2 by a human monoclonal SARS-CoV  
504 antibody. *Nature* **583**, 290–295 (2020).
- 505 29. Hsieh, C.-L. *et al.* Structure-based design of prefusion-stabilized SARS-CoV-2 spikes.  
506 *Science* **369**, 1501–1505 (2020).
- 507 30. Tegally, H. *et al.* Detection of a SARS-CoV-2 variant of concern in South Africa. *Nature* **592**,  
508 438–443 (2021).
- 509 31. Faria, N. R. *et al.* Genomics and epidemiology of the P.1 SARS-CoV-2 lineage in Manaus,  
510 Brazil. *Science* **372**, 815–821 (2021).
- 511 32. Planas, D. *et al.* Reduced sensitivity of SARS-CoV-2 variant Delta to antibody neutralization.  
512 *Nature* **596**, 276–280 (2021).
- 513 33. Zhao, F. *et al.* Broadening a SARS-CoV-1 neutralizing antibody for potent SARS-CoV-2  
514 neutralization through directed evolution. *bioRxiv* 2021.05.29.443900 (2021)  
515 doi:10.1101/2021.05.29.443900.
- 516 34. Mlcochova, P. *et al.* SARS-CoV-2 B.1.617.2 Delta variant replication, sensitivity to  
517 neutralising antibodies and vaccine breakthrough. *bioRxiv* 2021.05.08.443253 (2021)

- 518 doi:10.1101/2021.05.08.443253.
- 519 35. Zhang, Q. *et al.* Potent and protective IGHV3-53/3-66 public antibodies and their shared  
520 escape mutant on the spike of SARS-CoV-2. *Nat. Commun.* **12**, 4210 (2021).
- 521 36. Francino-Urdaniz, I. M. *et al.* One-shot identification of SARS-CoV-2 S RBD escape mutants  
522 using yeast screening. *Cell Rep.* **36**, 109627 (2021).
- 523 37. Yi, C. *et al.* Comprehensive Mapping of Binding Hot Spots of SARS-CoV-2 RBD-specific  
524 Neutralizing Antibodies for Tracking Immune Escape Variants. doi:10.21203/rs.3.rs-  
525 497595/v1.
- 526 38. Muecksch, F. *et al.* Affinity maturation of SARS-CoV-2 neutralizing antibodies confers  
527 potency, breadth, and resilience to viral escape mutations. *Immunity* **54**, 1853–1868.e7  
528 (2021).
- 529 39. Roberts, A. *et al.* Severe acute respiratory syndrome coronavirus infection of golden Syrian  
530 hamsters. *J. Virol.* **79**, 503–511 (2005).
- 531 40. Dejnirattisai, W. *et al.* Reduced neutralisation of SARS-CoV-2 omicron B.1.1.529 variant by  
532 post-immunisation serum. *Lancet* (2021) doi:10.1016/S0140-6736(21)02844-0.
- 533 41. Zhang, X. *et al.* SARS-CoV-2 Omicron strain exhibits potent capabilities for immune evasion  
534 and viral entrance. *Signal transduction and targeted therapy* vol. 6 430 (2021).
- 535 42. Carreño, J. M. *et al.* Activity of convalescent and vaccine serum against SARS-CoV-2  
536 Omicron. *Nature* (2021) doi:10.1038/d41586-021-03846-z.
- 537 43. Cameroni, E. *et al.* Broadly neutralizing antibodies overcome SARS-CoV-2 Omicron antigenic  
538 shift. *Nature* (2021) doi:10.1038/d41586-021-03825-4.
- 539 44. Sok, D. & Burton, D. R. Recent progress in broadly neutralizing antibodies to HIV. *Nat.*  
540 *Immunol.* **19**, 1179–1188 (2018).
- 541 45. Corti, D. & Lanzavecchia, A. Broadly neutralizing antiviral antibodies. *Annu. Rev. Immunol.*  
542 **31**, 705–742 (2013).
- 543 46. Liu, L. *et al.* Striking antibody evasion manifested by the Omicron variant of SARS-CoV-2.  
544 *Nature* (2021) doi:10.1038/d41586-021-03826-3.
- 545 47. Gaebler, C. *et al.* Evolution of antibody immunity to SARS-CoV-2. *Nature* **591**, 639–644  
546 (2021).
- 547 48. Poulsen, T. R., Jensen, A., Haurum, J. S. & Andersen, P. S. Limits for antibody affinity  
548 maturation and repertoire diversification in hypervaccinated humans. *J. Immunol.* **187**, 4229–  
549 4235 (2011).
- 550 49. Zheng, S. Q. *et al.* MotionCor2: anisotropic correction of beam-induced motion for improved  
551 cryo-electron microscopy. *Nat. Methods* **14**, 331–332 (2017).
- 552 50. Punjani, A., Rubinstein, J. L., Fleet, D. J. & Brubaker, M. A. cryoSPARC: algorithms for rapid  
553 unsupervised cryo-EM structure determination. *Nat. Methods* **14**, 290–296 (2017).
- 554 51. Zivanov, J., Nakane, T. & Scheres, S. H. W. Estimation of high-order aberrations and  
555 anisotropic magnification from cryo-EM data sets in -3.1. *IUCrJ* **7**, 253–267 (2020).
- 556 52. Punjani, A., Zhang, H. & Fleet, D. J. Non-uniform refinement: adaptive regularization



- 557 improves single-particle cryo-EM reconstruction. *Nat. Methods* **17**, 1214–1221 (2020).
- 558 53. Leem, J., Dunbar, J., Georges, G., Shi, J. & Deane, C. M. ABodyBuilder: Automated antibody  
559 structure prediction with data-driven accuracy estimation. *MAbs* **8**, 1259–1268 (2016).
- 560 54. Pettersen, E. F. *et al.* UCSF Chimera--a visualization system for exploratory research and  
561 analysis. *J. Comput. Chem.* **25**, 1605–1612 (2004).
- 562 55. Casañal, A., Lohkamp, B. & Emsley, P. Current developments in Coot for macromolecular  
563 model building of Electron Cryo-microscopy and Crystallographic Data. *Protein Sci.* **29**,  
564 1069–1078 (2020).
- 565 56. Conway, P., Tyka, M. D., DiMaio, F., Konerding, D. E. & Baker, D. Relaxation of backbone  
566 bond geometry improves protein energy landscape modeling. *Protein Sci.* **23**, 47–55 (2014).
- 567 57. Barad, B. A. *et al.* EMRinger: side chain-directed model and map validation for 3D cryo-  
568 electron microscopy. *Nat. Methods* **12**, 943–946 (2015).
- 569 58. Williams, C. J. *et al.* MolProbity: More and better reference data for improved all-atom  
570 structure validation. *Protein Sci.* **27**, 293–315 (2018).
- 571 59. Liebschner, D. *et al.* Macromolecular structure determination using X-rays, neutrons and  
572 electrons: recent developments in Phenix. *Acta Crystallogr D Struct Biol* **75**, 861–877 (2019).
- 573 60. Banach, B. B. *et al.* Paired heavy and light chain signatures contribute to potent SARS-CoV-2  
574 neutralization in public antibody responses. *bioRxiv* (2021) doi:10.1101/2020.12.31.424987.
- 575 61. Wrenbeck, E. E. *et al.* Plasmid-based one-pot saturation mutagenesis. *Nature Methods* vol.  
576 13 928–930 (2016).
- 577 62. Haas, C. M., Francino-Urdaniz, I. M., Steiner, P. J. & Whitehead, T. A. Identification of SARS-  
578 CoV-2 S RBD escape mutants using yeast screening and deep mutational scanning. *STAR*  
579 *Protoc* **2**, 100869 (2021).

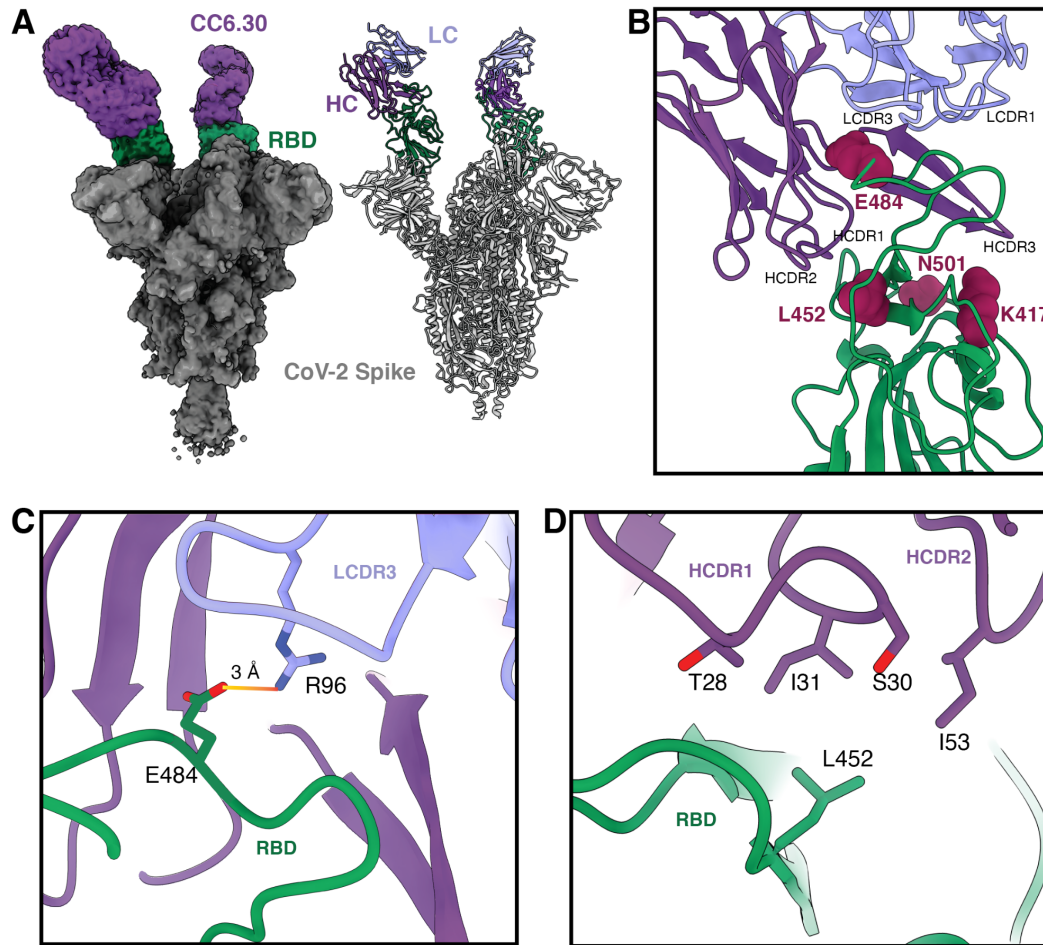

580

581

582

583

584

**Fig.1. Structural characterization of nAb CC6.30.** **a**, CryoEM map and model, with CC6.30 Fab and Spike RBD colored for clarity. **b**, Overview of CC6.30/RBD interface with key antibody CDRs and SARS-CoV-2 VOC mutation sites labeled. **c**, Salt bridge between LCDR3 R96 and RBD E484. **d**, Hydrophobic interactions between RBD L452 and side chains of HCDR1 and HCDR2.

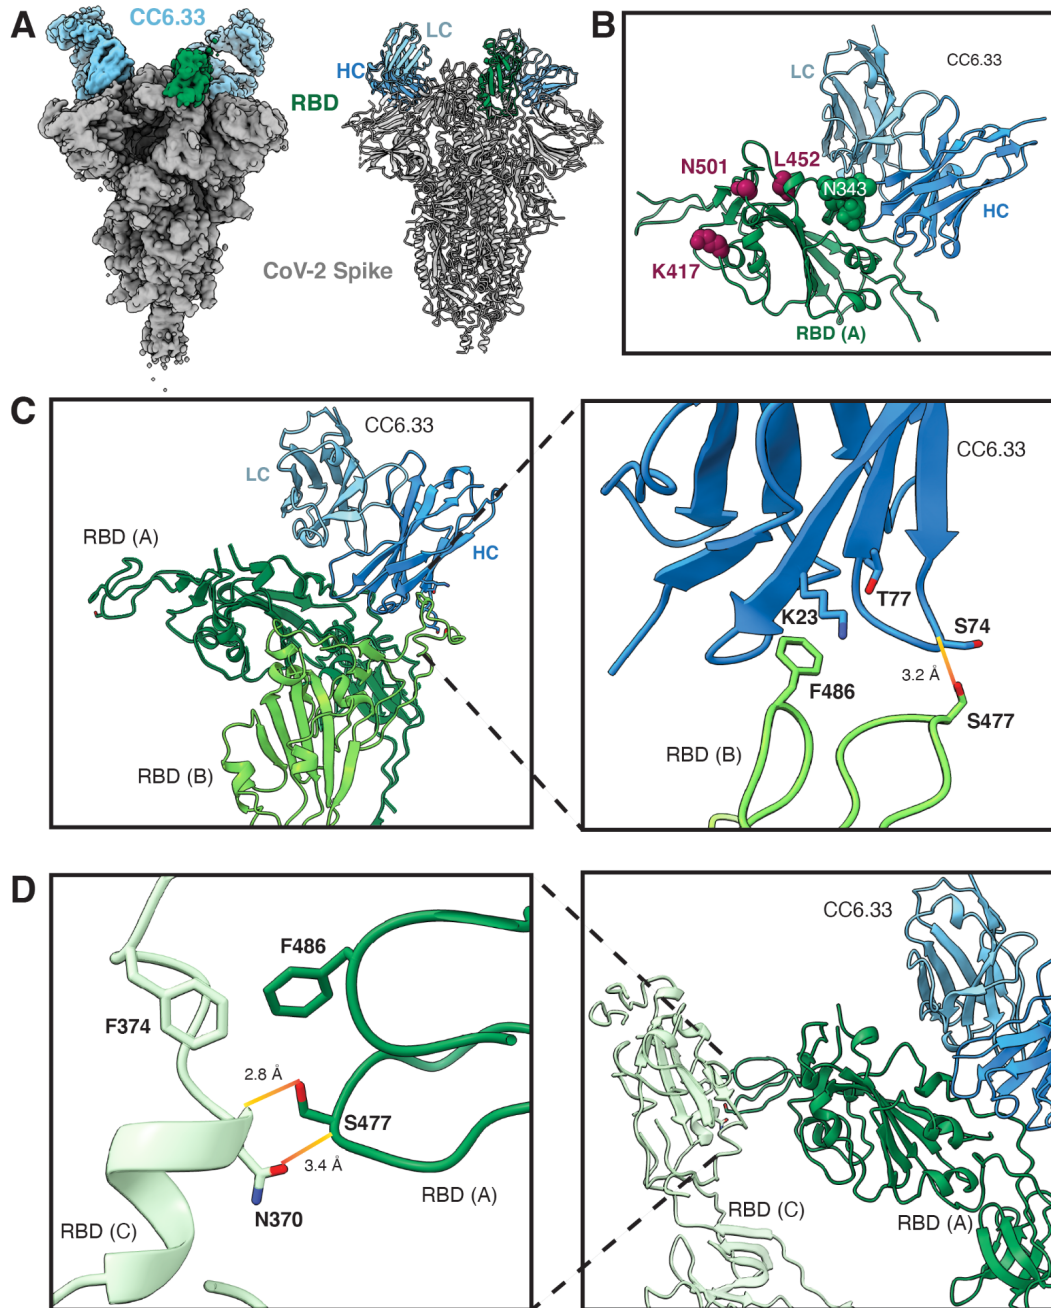

585

586

587

588

589

590

**Fig.2. Structural characterization of nAb CC6.33.** **a**, CryoEM map and model, with CC6.33 Fab and Spike RBD colored for clarity. **b**, Overview of CC6.33/RBD interface that is centered on the Spike N343 glycan. Common mutation sites in VOCs are highlighted and are distal from the CC6.33 epitope. **c** in a manner similar to the ridge of a down-RBD supporting a neighboring up-RBD **d**.

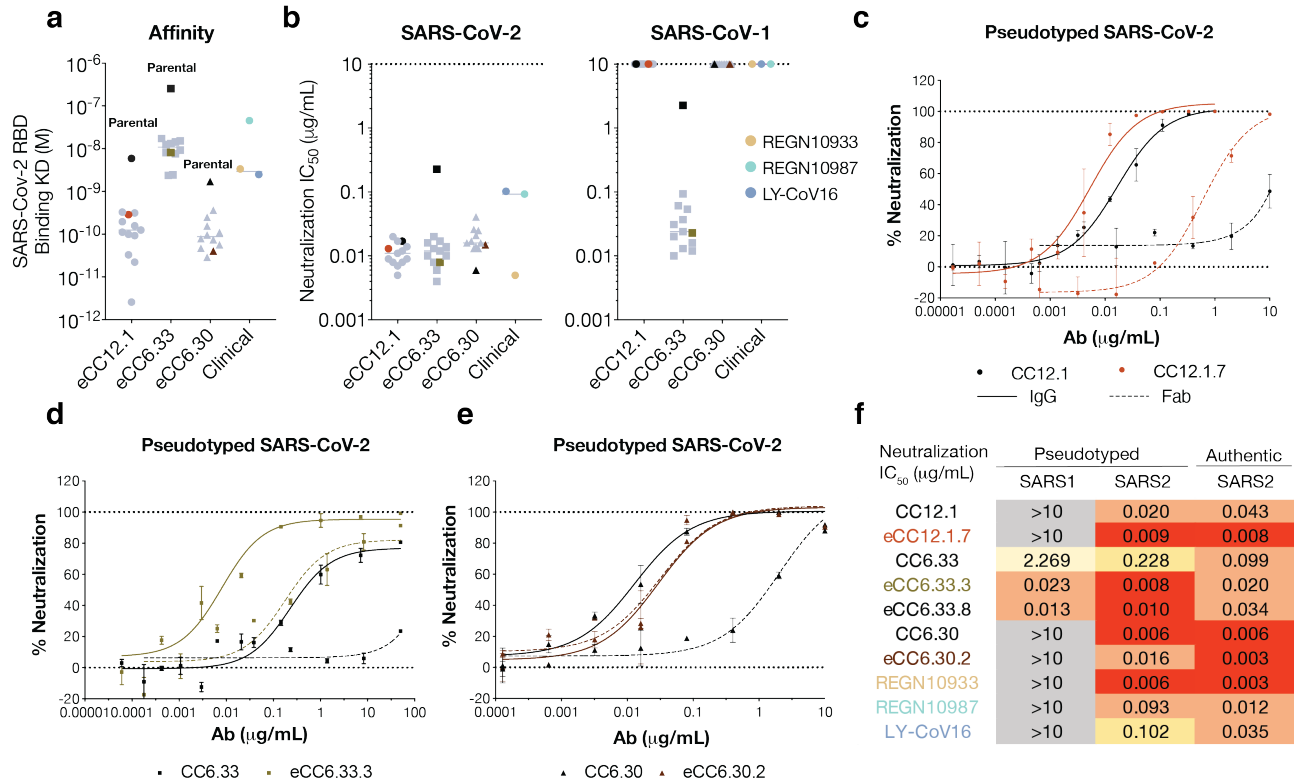

591  
592

593 **Fig.3. Binding affinity and neutralization potency of engineered SARS-CoV-2 nAbs.** a,  
594 Enhanced and parental nAbs binding affinity against SARS-CoV-2 RBD by surface plasmon  
595 resonance. Parental nAbs are highlighted in black. eCC12.1.7, eCC6.33.3 and eCC6.30.2 are  
596 highlighted whereas other engineered variants are colored in grey. RBD binding to antibodies via a  
597 Fc-capture, multi-cycle method. Association and dissociation rate constants were calculated  
598 through a 1:1 Langmuir binding model using the BIAevaluation software. b, Neutralization IC<sub>50</sub>  
599 against pseudotyped SARS-CoV-2 and SARS-CoV-1 viruses. c-e, SARS-CoV-2 pseudovirus  
600 neutralization curves of c parental CC12.1 and eCC12.1.7, d parental CC6.33 and eCC6.33.3, e  
601 parental CC6.30 and eCC6.30.2 in IgG and Fab molecules. Solid lines represent IgG neutralization  
602 whereas dashed lines represent Fab neutralization. Assays were run in duplicate. Error bars  
603 represent standard deviation. Data are representative of at least two independent experiments. f,  
604 Summary table of nAb neutralization IC<sub>50</sub> against pseudotyped SARS-CoV-1 and SARS-CoV2, as  
605 well as replicating SARS-CoV-2.

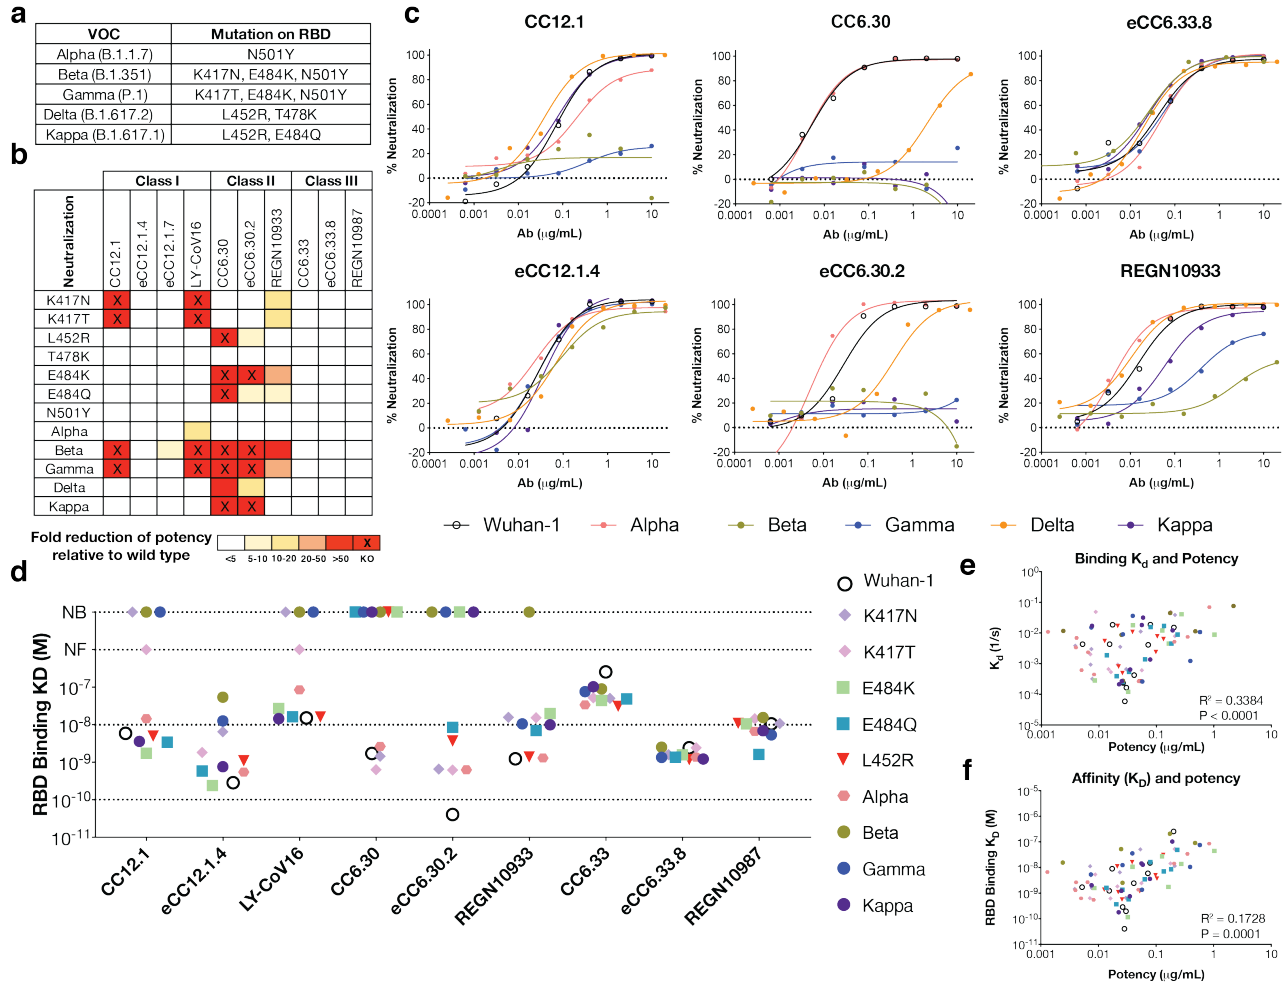

606

607

608

609

610

611

612

613

614

615

616

617

618

619

620

621

**Fig.4. Antibody neutralization activities against circulating variants.** **a**, Circulating SARS-CoV-2 variants of concern (VOC) and their mutations on RBD. **b**, Summary table of fold reduction of neutralization potency of mAbs against circulating SARS-CoV-2 variants and single mutations relative to the original lineage Wuhan-1. Fold difference of neutralization potency was colored according to the key. **c**, Representative neutralization curves of CC12.1, eCC12.1.7, CC6.30, eCC6.30.2, eCC6.33.8 and REGN10933 against Wuhan-1 as well as VOC including Alpha (B.1.1.7), Beta (B.1.351), Gamma (P.1), Delta (B.1.617.2), Kappa (B.1.617.1). Assays were run in duplicate. Data are representative of at least two independent experiments. SARS-CoV-2 and variants were colored according to the key. **d**, Antibody binding affinity ( $K_D$ ) against wild type SARS-CoV-2 RBD and RBD mutant proteins. NB: no binding. NF: Not fit to a simple kinetics model. Antibodies were captured to SPR sensors via a Fc-capture, multi-cycle method. Association and dissociation rate constants were calculated through a 1:1 Langmuir binding model using the BIAevaluation software. **e-f**, Pearson correlation analysis between antibody **e** off-rate constant ( $K_d$ ) or **f** equilibrium dissociation constant ( $K_D$ ) binding kinetics against RBD variants and antibody neutralization potency against mutant pseudoviruses.

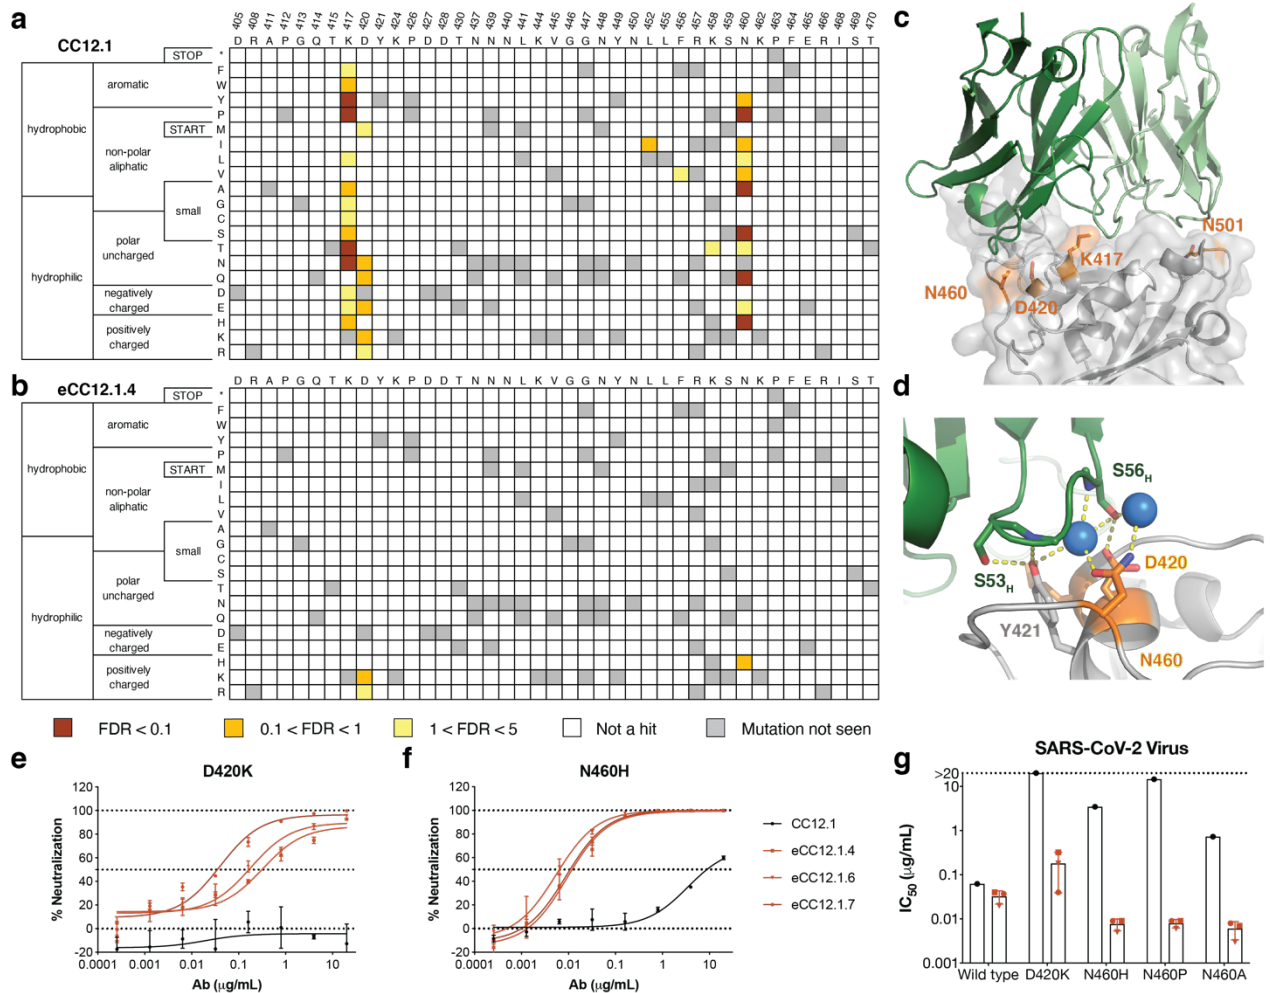

622

623

**Fig.5. Mapping potential RBD viral escape mutants from CC12.1 and eCC12.1.4.** **a-b**, Putative viral escape screening of **a** CC12.1 and **b** eCC12.1.4 using a RBD yeast display platform<sup>36</sup>. RBD variants that did not disrupt ACE2 interaction but evaded nAb recognition were sorted and sequenced. A control with no ACE2 labeling was also sorted and served as an empirical false discovery rate (FDR). The enrichment ratio for each mutation relative to the reference population was colored according to the key. The heatmap of RBD residues 405 - 470 was shown, whereas the full map of residues from 333 to 527 was shown in **Supplementary Fig.7**. **c-d**, Crystal structure of CC12.1 interacting with SARS-CoV-2 RBD modified from PDB: 6XC2<sup>24</sup>. CC12.1 heavy chain and light chain were colored in dark green and light green respectively. Key binding residues N501, K417, N460 and D420 on RBD were highlighted in orange. **e-f**, Representative neutralization curves of CC12.1, eCC12.1, eCC12.1.6, and eCC12.1.7 against SARS-CoV-2 **e** D420K and **f** N460H. Antibodies were colored according to the key. Error bars represent standard deviation. Data were representative of at least two independent experiments. **g**, Neutralization potency of parental CC12.1 and eCC12.1 variants against wild type SARS-CoV-2 virus and D420K, N460H, N460P, N460A mutant viruses.

637

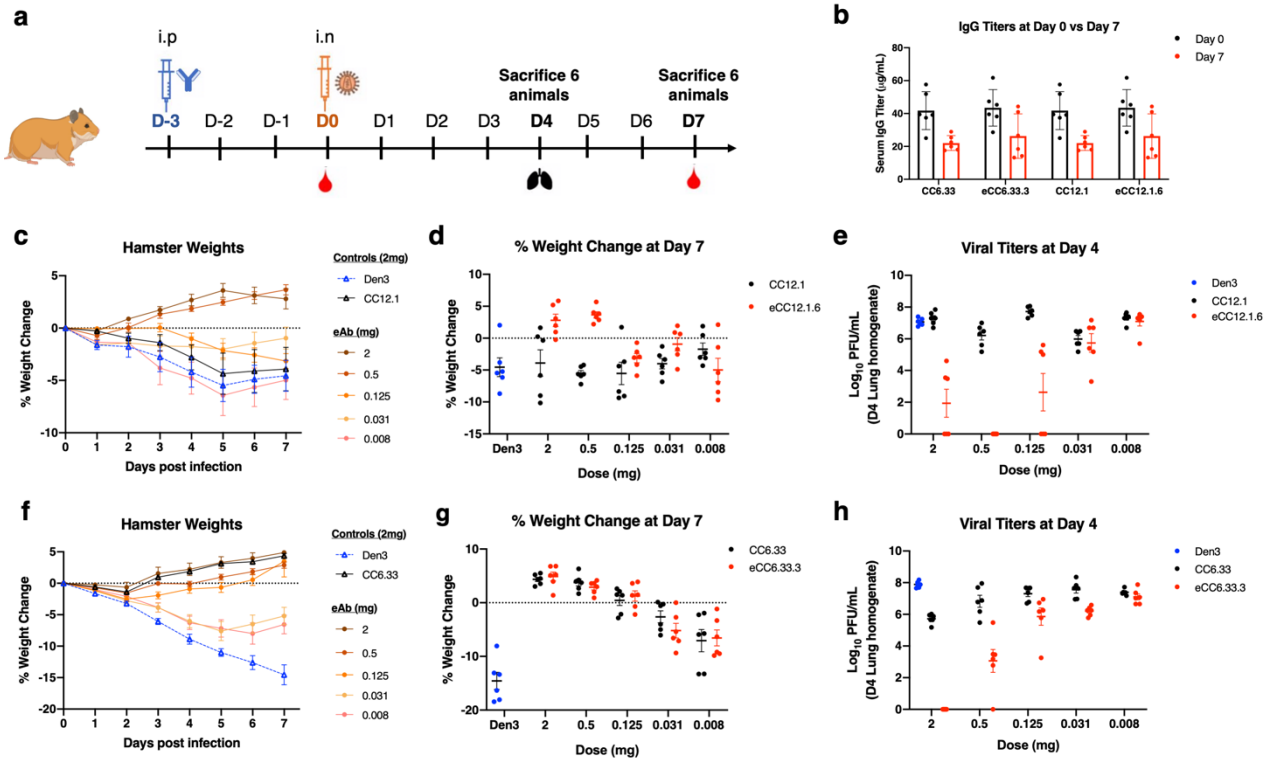

638

639 **Fig.6. Protection of hamsters against SARS-CoV-2 challenge by parental and engineered**  
 640 **nAbs.** **a**, Overview of study design. Animal groups administered CC12.1 or eCC12.1.6 were  
 641 challenged with  $1 \times 10^5$  PFU of SARS-CoV-2 (hCoV-19/South Africa/KRISP-EC-K005321/2020),  
 642 those administered with CC6.33 or eCC6.33.3 were challenged with  $1 \times 10^5$  PFU of SARS-CoV-2  
 643 (USA-WA1/2020). **b**, Serum antibody concentration at time of infection (Day 0) versus the time of  
 644 sacrifice (Day 7). **c**, Effect of CC12.1 vs eCC12.1.6 on weight loss in prophylaxis groups. **d**, Percent  
 645 weight change for all groups from **c** on day 7 post infection. **e**, Viral load 4 days post infection as  
 646 quantitated by live virus plaque assay on Vero E6 cells from lung tissue homogenate. Error bars  
 647 represent geometric standard deviations of the geometric mean. **f**, Effect of CC6.33 vs eCC6.33.3  
 648 on weight loss in prophylaxis groups. **g**, Representative percent weight change for all groups from  
 649 **f** on day 7 post infection. **h**, viral load, detected as shown in **e**. Statistical significance ( $p < 0.05$ ) of  
 650 groups in comparison to the Den3 IgG control group were calculated by Ordinary One-Way ANOVA  
 651 test using Graph Pad Prism 8.0. Error bars represent group average with standard error of the  
 652 mean.

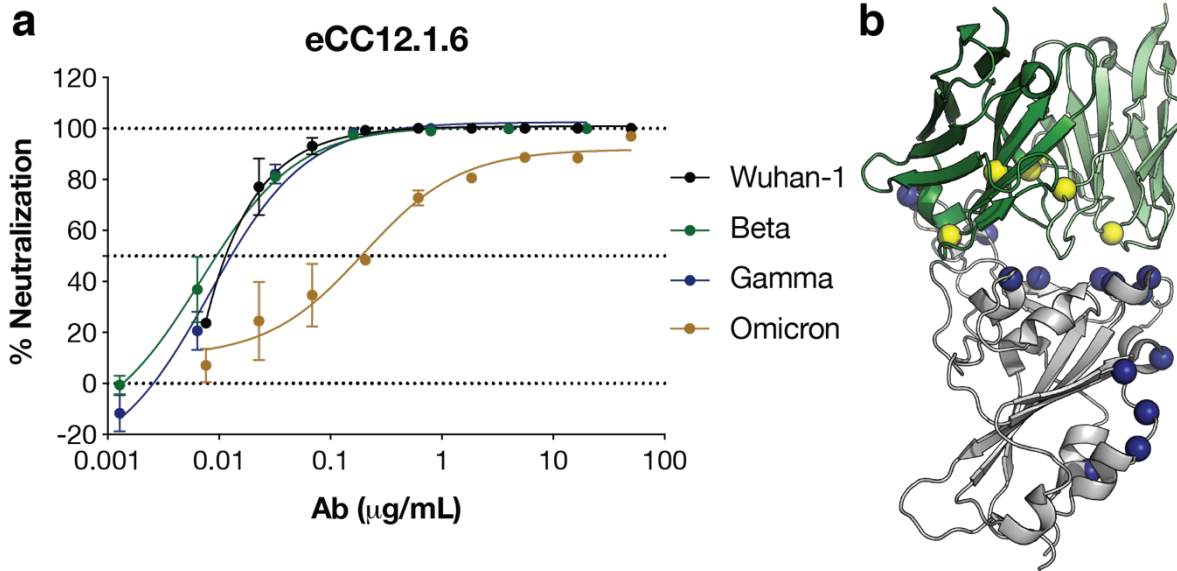

653

654 **Fig.7. Neutralization and interaction of eCC12.1.6 against the Omicron variant. a,**  
655 **Representative neutralization curves of eCC12.1.6 against SARS-CoV-2 VOCs. Wildtype SARS-**  
656 **CoV-2 and VOCs were colored according to the key. Error bars represent standard deviation. b,**  
657 **Structure of eCC12.1.6 interacting with Omicron RBD modified from PDB: 6XC2<sup>24</sup>. eCC12.1.6**  
658 **heavy chain and light chain were colored in dark green and light green respectively. Antibody**  
659 **mutant residues were highlighted in yellow spheres while Omicron RBD mutant residues were**  
660 **highlighted in navy blue spheres.**



## 661 **Materials and Methods**

### 662 **Syrian hamsters**

663 Golden Syrian hamsters were provided by Charles River Laboratories (CRL:LVG(SYR)) and  
664 housed at the Scripps Research Institute. Male 12–13-week-old hamsters were infused with  
665 antibodies intraperitoneally as described previously<sup>23</sup>. The Scripps Research Institutional Animal  
666 Care and Use Committee (IACUC) approved all experimental procedures involving all the animals  
667 in accordance with Protocol #20-0003.

668

### 669 **Cell lines**

670 *Saccharomyces cerevisiae* YVH10 cells (ATCC) were used in antibody library generation and FACS  
671 sort. Hela-hACE2 cells<sup>23</sup> were used in pseudovirus neutralization assay. *Saccharomyces cerevisiae*  
672 EBY100 cells (ATCC) were used in RBD mutant library generation and FACS sort. Human  
673 HEK293T cells (ATCC) were used for pseudovirus production. FreeStyle HEK293 cells  
674 (ThermoFisher) were used for recombinant S protein production. Expi293F cells (ThermoFisher)  
675 were used for monoclonal antibody and recombinant RBD production. Vero-E6 cells (ATCC) were  
676 used for live virus plaque assay.

677

### 678 **Recombinant S and RBD production**

679 SARS-CoV-1 (Genbank AAP13567) or SARS-CoV-2 (Genbank MN908947) S proteins were  
680 transiently expressed in Freestyle 293F system (ThermoFisher) whereas RBD proteins were  
681 expressed in the Expi293 system (ThermoFisher). In brief, S expression plasmids were  
682 cotransfected with 40K PEI (1 mg/mL) at a ratio of 1:3. After incubation for 30 min at RT, transfection  
683 mixture was added to Freestyle 293F cells at a density of approximately 1 million cells/mL. RBD  
684 plasmids with His-Avitag were cotransfected with FectoPRO (Polyplus 116-010). SARS-CoV-2  
685 RBD mutant plasmids were generated by Quikchange site-directed mutagenesis according to  
686 manufacturer's instructions (Agilent, 210513). Biotinylated proteins were made by co-transfecting  
687 Avitagged RBD plasmids with a BirA expression plasmid and into Expi293 cells using FectoPRO.  
688 After incubation for 10 min at RT, transfection mixture was added to Expi293 cells at a density of ~  
689 3 million cells/mL. After 24h of transfection, cells were fed with D-(+)- glucose solution and 300 mM  
690 of sterile sodium valproic acid solution. After 5 days of transfection, supernatants were harvested  
691 and filtered with a 0.22 µm membrane. The His-tagged proteins were purified with the HisPur Ni-  
692 NTA Resin (Thermo Fisher, 88222). After three columns of washing with 25 mM Imidazole (pH 7.4),  
693 proteins were eluted with an elution buffer (250 mM Imidazole, pH 7.4) at slow gravity speed (~4  
694 sec/drop). Eluted proteins were buffer exchanged and concentrated with PBS using Amicon tubes  
695 (Millipore). The proteins were further purified by size exclusion chromatography (SEC) using  
696 Superdex 200 (GE Healthcare). The selected fractions were pooled and concentrated.

697

698 For cryoEM, a stabilized version of CoV-2 S protein, HPM7 (hexaprolin mutant 7) was used. The  
699 design, expression and purification has been described previously<sup>14</sup>. Briefly, the S protein is  
700 stabilized with 6 engineered proline residues<sup>29</sup> and an interprotomer disulfide between residues 705  
701 and 883 of S2. HPM7 was expressed in HEK293F, and purified using a C-terminal 2x StrepTag  
702 followed by size exclusion chromatography to isolate trimers.

703

#### 704 **Antibody production and purification**

705 Monoclonal antibody was transiently expressed in the Expi293 system (ThermoFisher, A14635). In  
706 brief, antibody HC and LC plasmids were co-transfected at a ratio of 1:2.5 with transfection reagent  
707 FectoPRO (Polyplus 116-010). After 24 h of transfection, 300 mM of sterile sodium valproic acid  
708 solution (Sigma-Aldrich, P4543) and 45% D-(+)- glucose solution (Sigma Aldrich, G8769-100ML)  
709 were added to feed cells. After 4-5 days of transfection, supernatants were collected, sterile-filtered  
710 (0.22 µm), and IgG was purified with Protein A sepharose beads (GE Healthcare 17-5280-04).

711

#### 712 **Expression and purification of Fab**

713 The CC6.33, eCC6.33.3, CC6.30, eCC6.30.2 Fabs were purified by digesting IgG using Fab  
714 digestion kit (ThermoFisher, 44985) according to manufacturer's instructions. After digestion, Fc  
715 fragments and undigested IgG were removed from binding to the protein A beads (GE Healthcare).  
716 CC12.1 and eCC12.1.7 Fab fragments were generated by introducing a stop codon after the CH1  
717 region in heavy chain expression plasmids. After transfection, Fabs were purified using Cpto L  
718 beads (Cytiva, 17547801).

719

#### 720 **CryoEM data collection and processing**

721 To form the antibody-spike complexes, CC6.30 Fab or CC6.33 IgG was incubated with HPM7 spike  
722 trimer for approximately 15 minutes. A 9:2 molar ratio of CC6.30 Fab to spike or 1:2 molar ratio of  
723 CC6.33 IgG to spike was used. Samples were concentrated to about 1.7 mg/mL, n-dodecyl-β-D-  
724 maltopyranoside (DDM) was added to a final concentration of 0.06 mM, and the mixture and applied  
725 to plasma cleaned Quantifoil 1.2/1.3 400 copper mesh, holey carbon grids. Grids were vitrified using  
726 the Vitrobot Mark IV system (Thermo Fisher) set to 4°C, 100% humidity, with a blot time of 3  
727 seconds.

728

729 Data were collected on a Thermo Fisher Titan Krios equipped with a Gatan K2 Summit direct  
730 electron detector. Detailed data collection statistics are summarized in Supplementary Table 1 and  
731 2. Movie micrographs were motion corrected and dose weighted using MotionCorr<sup>249</sup>. Aligned  
732 micrographs were imported into cryoSPARC version 3.2<sup>50</sup> and CTF corrections were performed  
733 using the Patch CTF application in cryoSPARC. Automated particle picking, particle extraction, and  
734 initial 2D classifications were performed in cryoSPARC. Particles belonging to selected 2D classes  
735 were then imported into Relion 3.1<sup>51</sup>. Interactive rounds of 3D classification and refinement, and  
736 CTF refinements were performed for each dataset. To improve resolution of the antibody epitope

737 and paratope, the best refinement from each dataset (Spike with 2 Fabs bound for both CC6.30  
738 and CC6.33) was subjected to C3 symmetry expansion and focused classifications, using a  
739 spherical mask around the expected Fab/RBD region of a single protomer and Relion 3D  
740 classification without alignments. Particles containing density for Fab and RBD in the region of  
741 interest were imported into cryoSPARC. Signal outside of the RBD and Fab Fv was subtracted, and  
742 the subtracted particles were subjected to cryoSPARC local refinement (Supplementary Fig.1-2).  
743 The non-symmetry expanded particles from the best Relion global refinements were imported into  
744 cryoSPARC and subjected to a final round of non-uniform refinement<sup>52</sup>. Additionally, the CC6.33  
745 dataset contained thousands of ligand-free HMP7 Spike particles which were also imported into  
746 cryoSPARC for final non-uniform refinement, with or without symmetry (Figure S2C and S2D). Final  
747 Fourier shell correlation resolution estimates for all maps, along with EMDB deposition codes, can  
748 be found in Supplementary Table 1 and 2.

749

### 750 **CryoEM model building**

751 Homology models of the Fab variable regions of CC6.30 and CC6.33 were generated using  
752 ABodyBuilder<sup>53</sup> and fitted into the respective local refinement maps using UCSF Chimera<sup>54</sup>.  
753 Coordinates for RBD with complete ridge were taken from PDB 7byr. The RBD:Fv models were  
754 subjected to interactive cycles of manual and automated refinement using Coot 0.9<sup>55</sup> and Rosetta<sup>56</sup>.  
755 Once a high map-to-model agreement was reaching, as measured by EMRinger<sup>57</sup>, and geometries  
756 were optimized, as judged by MolProbity<sup>58</sup>, the models were fit into the non-uniform refinement full  
757 trimer maps and combined with a Spike model refined into the ligand-free map (PDB 6vxx was used  
758 as the initial model and HPM7 mutations were added manually in Coot following iterative rounds of  
759 Rosetta relaxed refinement and Coot manual editing). The resulting Fv:trimer models were refined  
760 in Rosetta. The Phenix software suite<sup>59</sup> was used for structure validation, and for editing and  
761 preparation of PDB files for deposition. Final refinement statistics and PDB deposition codes for  
762 generated models can be found in Supplementary Table 1 and 2.

763

### 764 **Antibody library generation**

765 CC12.1, CC6.30 and CC6.33 heavy chain and light chain affinity maturation libraries were  
766 synthesized as Oligopools (Integrated DNA Technologies). Mutations were included in the CDR  
767 loops and the CDR1/2/3 mini-libraries were assembled into combinatorial heavy chain and light  
768 chain libraries as previously described<sup>33</sup>. The libraries were displayed on the surface of yeast as  
769 molecular Fab using the yeast display vector pYDSI containing the bidirectional Gal1-10 promoter.  
770 The heavy chain contains a C-terminal V5 epitope tag and the light chain contains a C-terminal C-  
771 myc epitope tag to assess the amount of Fab displayed on the surface of the yeast. The HC library  
772 was generated by cloning the HC CDR1/2/3 library into the vector containing the wildtype light chain  
773 by homologous recombination, and the LC library was generated by doing the inverse. The  
774 combinatorial H/L library was generated by amplifying the HC and LC sequences with primers  
775 overlapping in the Gal1-10 promoter. The recovered Gal-HC and Gal-LC fragments were ligated

776 via Gibson assembly and amplified. The resulting LC-Gal1-10-HC product was cloned into an empty  
777 pYDSI vector by homologous recombination<sup>33</sup>.

778

### 779 **Yeast library labeling and sorting**

780 After yeast transformation, yeast cells were passaged 1:20 the following day. Cells were then  
781 induced at OD<sub>600</sub> = 1.0 overnight at 30°C in SGCAA induction medium (20 g galactose, 1 g glucose,  
782 6.7 g yeast nitrogen base without amino acid, 5 g bacto casamino acids, 5.4 g Na<sub>2</sub>HPO<sub>4</sub>, 8.56 g  
783 NaH<sub>2</sub>PO<sub>4</sub>•H<sub>2</sub>O, 8.56 mg uracil in 1 L deionized water, pH 6.5, and sterilize by filtration). For each  
784 library, in the first round of selection, 5 x 10<sup>7</sup> of yeast cells were stained per sample. In the second  
785 to final round of selection, 1 x 10<sup>7</sup> cells were stained. Yeast cells were firstly spun down and washed  
786 with PBSA (PBS + 1% BSA), then incubated with biotinylated SARS-CoV-2 RBD or S or HEK cell  
787 membrane protein at several non-depleting concentrations respectively for at least 30 min at 4°C.  
788 After washing, yeast cells were stained with FITC-conjugated chicken anti-C-Myc antibody  
789 (Immunology Consultants Laboratory, CMYC-45F), AF405-conjugated anti-V5 antibody (made in  
790 house), and streptavidin-APC (Invitrogen, SA1005) in 1:100 dilution for 20 min at 4 °C. After  
791 washing, yeast cells were resuspended in 1 mL of PBSA and loaded on BD FACSMelody cell sorter.  
792 Top 5-10% of cells with high binding activity to a certain SARS-CoV-2 RBD labeling concentration  
793 were sorted and spun down. Sorted cells were expanded in 2 mL of synthetic drop-out medium  
794 without tryptophan (Sunrise, 1709-500) supplemented with 1% Penicillin/Streptomycin (Corning,  
795 30-002-C) at 30°C overnight.

796

### 797 **Size exclusion chromatography analysis**

798 The antibodies were analyzed by size exclusion chromatography using the 1260 Infinity II (Agilent).  
799 15 uL of each antibody at 2 mg/mL was injected into the TSKgel SuperSW mAb column (Tosoh)  
800 with the flow rate of 1 mL/min.

801

### 802 **Pseudovirus neutralization assay**

803 Pseudovirus was generated as described previously<sup>23</sup>. In brief, MLV gag/pol backbone (Addgene,  
804 14887), MLV-CMV-Luciferase plasmid (Addgene, 170575), and SARS-CoV-2-d18 (Genbank  
805 MN908947) or SARS-CoV-1-d28 (Genbank AAP13567) or SARS-CoV-2 VOC spike plasmid were  
806 incubated with transfection reagent Lipofectamine 2000 (Thermo Fisher, 11668027) following  
807 manufacturer's instructions for 20 min at RT. Full-spike mutations were introduced by overlapping  
808 extension polymerase chain reaction (PCR) to generate mutated spikes of circulating SARS-CoV-  
809 2 VOC, i.e., B.1.1.7, B.1.351, P.1, B.1.617.1, B.1.617.2, and B.1.1.529. Then the mixture was  
810 transferred onto HEK 293T cells (ATCC, CRL-3216) in a 10 cm<sup>2</sup> culture dish (Corning, 430293).  
811 After 12-16 h of transfection, culture medium was gently removed, fresh DMEM medium was added  
812 onto the culture dish. Supernatants containing pseudovirus were harvested after 48 h post  
813 transfection and frozen at -80 °C for long term storage.

814

815 In the neutralization assay, antibody samples were serially diluted with complete DMEM medium  
816 (Corning, 15-013-CV) containing 10% FBS (Omega Scientific, FB-02), 2 mM L-Glutamine (Corning,  
817 25-005-CI), and 100 U/mL of Penicillin/Streptomycin (Corning, 30-002-C). 25  $\mu$ L/well of diluted  
818 samples were then incubated with 25  $\mu$ L/well of pseudotyped virus for 1 h at 37 °C in 96-well half-  
819 area plates (Corning, 3688). After that, 50  $\mu$ L of Hela-hACE2 cells at 10,000 cells/well with 20  $\mu$ g/mL  
820 of Dextran were added onto each well of the plates. After 48 h of incubation, cell culture medium  
821 was removed, luciferase lysis buffer (25 mM Gly-Gly pH 7.8, 15 mM MgSO<sub>4</sub>, 4 mM EGTA, 1%  
822 Triton X-100) was added onto cells. Luciferase activity was measured by BrightGlo substrate  
823 (Promega, PR-E2620) according to the manufacturer's instructions. mAbs were tested in duplicate  
824 wells and independently repeated at least twice. Neutralization IC<sub>50</sub> values were calculated using  
825 "One-Site Fit LogIC50" regression in GraphPad Prism 8.0.

826

### 827 **Authentic SARS-CoV-2 neutralization assay**

828 Vero-E6 cells were seeded in 96-well half-well plates at approximately 8000 cells/well in a total  
829 volume of 50  $\mu$ L complete DMEM medium the day prior to the addition of antibody and virus mixture.  
830 The virus (500 plaque forming units/well) and antibodies were mixed, incubated for 30 minutes and  
831 added to the cells. The transduced cells were incubated at 37°C for 24 hours. Each treatment was  
832 tested in duplicate. The medium was removed and disposed of appropriately. Cells were fixed by  
833 immersing the plate into 4% formaldehyde for 1 hour before washing 3 times with phosphate  
834 buffered saline (PBS). The plate was then either stored at 4°C or gently shaken for 30 minutes with  
835 100  $\mu$ L/well of permeabilization buffer (PBS with 1% Triton-X). All solutions were removed, then  
836 100  $\mu$ L of 3% bovine serum albumin (BSA) was added, followed by room temperature (RT)  
837 incubation at 2 hours.

838

839 A mix of primary antibodies consisting of CC6.29, CC6.33, CC6.36, CC12.23, CC12.25<sup>23</sup> in equal  
840 amounts for detection. The primary antibody mixture was diluted in PBS/1% BSA to a final  
841 concentration of 2  $\mu$ g/ml. The blocking solution was removed and washed thoroughly with wash  
842 buffer (PBS with 0.1% Tween-20). The primary antibody mixture, 50  $\mu$ L/well, was incubated with the  
843 cells for 2 hours at RT. The plates were washed 3 times with wash buffer.

844

845 Peroxidase AffiniPure Goat Anti-Human IgG (H+L) secondary antibody (Jackson  
846 ImmunoResearch, 109-035-088) diluted to 0.5  $\mu$ g/mL in PBS/1% BSA was added at 50  $\mu$ L/well  
847 and incubated for 2 hours at RT. The plates were washed 6 times with wash buffer. HRP substrate  
848 (Roche, 11582950001) was freshly prepared as follows: Solution A was added to Solution B in a  
849 100:1 ratio and stirred for 15 minutes at RT. The substrate was added at 50  $\mu$ L/well and  
850 chemiluminescence was measured in a microplate luminescence reader (BioTek, Synergy 2).

851

852 The following method was used to calculate the percentage neutralization of SARS-CoV-2. First,  
853 we plotted a standard curve of serially diluted virus (3000, 1000, 333, 111, 37, 12, 4, 1 PFU) versus  
854 RLU using four-parameter logistic regression (GraphPad Prism 8.0).

855

#### 856 **Recombinant protein ELISA**

857 6x-His tag antibodies (Invitrogen, MA1-21315) were coated at 2 µg/mL in PBS onto 96-well half-  
858 area high binding plates (Corning, 3690) overnight at 4°C. After washing and blocking, 1 µg/mL of  
859 his tagged recombinant SARS-CoV-2 (or SARS-CoV-1) RBD or S proteins were diluted in PBS with  
860 1% BSA and incubated for 1 h at RT. After washing, serially diluted antibodies were added in plates  
861 and incubated for 1 h at RT. After washing, alkaline phosphatase-conjugated goat anti-human IgG  
862 Fc $\gamma$  secondary antibody (Jackson ImmunoResearch, 109-055-008) was added in 1:1000 dilution  
863 and incubated for 1 h at RT. After final wash, phosphatase substrate (Sigma-Aldrich, S0942-  
864 200TAB) was added into each well. Absorption was measured at 405 nm.

865

#### 866 **Polyspecificity reagent (PSR) ELISA**

867 Solubilized CHO cell membrane proteins (SMP) were made in house. SMP, human insulin (Sigma-  
868 Aldrich, I2643), single strand DNA (Sigma-Aldrich, D8899) were coated onto 96-well half-area high-  
869 binding ELISA plates (Corning, 3690) at 5 µg/mL in PBS overnight at 4°C. After washing, plates  
870 were blocked with PBS/3% BSA for 1 h at RT. Antibody samples were diluted at 100 µg/mL in 1%  
871 BSA with serial dilution and then added in plates and incubated for 1 h at RT. After washing, alkaline  
872 phosphatase-conjugated goat anti-human IgG Fc $\gamma$  secondary antibody (Jackson ImmunoResearch,  
873 109-055-008) was added in 1:1000 dilution and incubated for 1h at RT. After final wash,  
874 phosphatase substrate (Sigma-Aldrich, S0942-200TAB) was added into each well. Absorption was  
875 measured at 405 nm.

876

#### 877 **HEp2 epithelial cell polyreactive assay**

878 Reactivity to human epithelial type 2 (HEp2) cells was determined by indirect immunofluorescence  
879 on HEp2 slides (Hemagen, 902360) according to manufacturer's instructions. Briefly, mAbs were  
880 diluted at 100 µg/mL in PBS respectively and then incubated onto immobilized HEp2 slides for 30  
881 min at RT. After washing, one drop of FITC-conjugated goat anti-human IgG antibody was added  
882 onto each well and incubated in the dark for 15-30 min at RT. After washing with PBS, a cover slide  
883 was added to HEp2 cells with glycerol and the slide was photographed on a Nikon fluorescence  
884 microscope to detect GFP. All panels were shown at magnification 40x.

885

#### 886 **Surface plasmon resonance methods**

887 SPR measurements were carried out on a Biacore 8K instrument at 25°C. All experiments were  
888 carried out with a flow rate of 30 µL/min in a mobile phase of HBS-EP [0.01 M HEPES (pH 7.4),  
889 0.15 M NaCl, 3 mM EDTA, 0.0005% (v/v) Surfactant P20]. Anti-Human IgG (Fc) antibody (Cytiva)

890 was immobilized to a density ~7000-10000 RU via standard NHS/EDC coupling to a Series S CM-  
891 5 (Cytiva) sensor chip. A reference surface was generated through the same method.

892

893 For conventional kinetic/dose-response, listed antibodies were captured to 50-100 RU via Fc-  
894 capture on the active flow cell prior to analyte injection. A concentration series of SARS-CoV-2 RBD  
895 was injected across the antibody and control surface for 2 min, followed by a 5 min dissociation  
896 phase using a multi-cycle method. Regeneration of the surface in between injections of SARS-CoV-  
897 2 RBD was achieved by a single, 120s injection of 3M MgCl<sub>2</sub>. Kinetic analysis of each reference  
898 subtracted injection series was performed using the BIAEvaluation software (Cytiva). All  
899 sensorgram series were fit to a 1:1 (Langmuir) binding model of interaction.

900

### 901 **RBD library generation and identification of escape mutants**

902 Yeast display plasmids pJS697 and pJS699 used for surface display of Wuhan-Hu-1 S RBD N343Q  
903 were previously described<sup>60</sup>. Using these plasmids, 119 surface exposed positions on the original  
904 Wuhan-Hu-1 S RBD N343Q (positions 333-537) were mutated to every other amino acid plus stop  
905 codon using degenerate NNK primers using comprehensive nicking mutagenesis<sup>61</sup> exactly as  
906 previously described<sup>36,62</sup>. Two tiles were constructed for compatibility with 250bp paired end Illumina  
907 sequencing (tile 1: positions 333-436; tile 2: positions 437-527). Libraries were transformed into *S.*  
908 *cerevisiae* EBY100 and stocks of 1e8 viable yeast cells in 1 mL were stored in yeast storage buffer  
909 (20 w/v % glycerol, 200 mM NaCl, 20 mM HEPES pH 7.5) at -80°C. Library coverage was confirmed  
910 by 250 bp paired end Illumina deep sequencing, with statistics reported in Supplementary Table 5.

911 S RBD escape mutants are identified by a competitive assay between a nAb and soluble ACE2 as  
912 fully described in Francino-Urdaniz et al<sup>36</sup>. Briefly, yeast cells are grown in SDCAA for 4 hr at 30°C,  
913 pelleted, and then induced in SGCAA for 22 hr at 22°C. Cells are washed thoroughly in PBSA (PBS  
914 containing 1g/L BSA) and then 3x10<sup>7</sup> induced EBY100 yeast cells displaying S RBD were labelled  
915 with 10 µg/ml nAb IgG for 30min at room temperature with mixing by pipetting every 10min in PBSA.  
916 The same cells were labelled with 75 nM chemically biotinylated ACE2, in the same tube, for 30min  
917 at room temperature in PBSA with mixing by pipetting every 10 min. The cells were centrifuged and  
918 washed with 1mL PBSA. Cells were then labeled with 1.2 µL FITC, 0.5 µL SAPE and 98.3 µL PBSA  
919 for 10min at 4°C. Cells were centrifuged, washed with 1mL PBSF, resuspended to 1 mL PBSA and  
920 sorted using FACS. Two additional populations were sorted: a reference population containing only  
921 an FSC/SSC gate for isolation of yeast cells (see below) and a control population of library not  
922 competitively labelled.

923

924 To discriminate cell populations FACS gates are used as shown in Figure S7: an FSC/SSC gate  
925 for isolation of yeast cells, FSC-H/FSC-A gate to discriminate single cells, a FSC-A/FITC+ gate  
926 selects the cells displaying the RBD on their surface and the top 2% of cells by a PE<sup>+</sup>/FITC<sup>+</sup> gate is  
927 collected. At least 2.0x10<sup>5</sup> cells are collected and recovered in SDCAA with 50 µg/mL Kanamycin

928 and 1x Pen/Strep for 30h at 30°C. The collected DNA is sequenced using 250 bp PE on an Illumina  
929 MiSeq and analyzed with the code developed by Francino-Urdaniz et al<sup>36</sup>. Outputs from the code  
930 are a per-mutation enrichment ratio defined as the log<sub>2</sub>-transform of the change in frequency of the  
931 selected population relative to the reference population and a false discovery rate (FDR) as  
932 previously described<sup>36</sup>.

933

### 934 **Animal Study**

935 Golden Syrian hamsters were provided by Charles River Laboratories (CRL:LVG(SYR)) and  
936 housed at the Scripps Research Institute. Animals were infused with antibodies intraperitoneally as  
937 described previously<sup>23</sup>. The Scripps Research Institutional Animal Care and Use Committee  
938 (IACUC) approved all experimental procedures involving all the animals in accordance with Protocol  
939 #20-0003.

940

### 941 **Viral load measurements - plaque assay**

942 SARS-CoV-2 titers were measured by homogenizing lung tissue in DMEM 2% FCS using 100 µm  
943 cell strainers (Myriad, 2825-8367). Homogenized organs were titrated 1:10 over 6 steps and layered  
944 over Vero-E6 cells. After 1 h of incubation at 37°C, a 1% methylcellulose in DMEM overlay was  
945 added, and the cells were incubated for 3 days at 37°C. Cells were fixed with 4% PFA and plaques  
946 were counted by crystal violet staining.

947

### 948 **Statistical analysis**

949 Statistical analysis was performed using Graph Pad Prism 8 for Mac, Graph Pad Software, San  
950 Diego, California, USA. Groups of data were compared using several methods including the  
951 grouped parametric One-Way ANOVA test and the grouped non-parametric Kruskal-Wallis test.  
952 Data were considered statistically significant at  $p < 0.05$ .



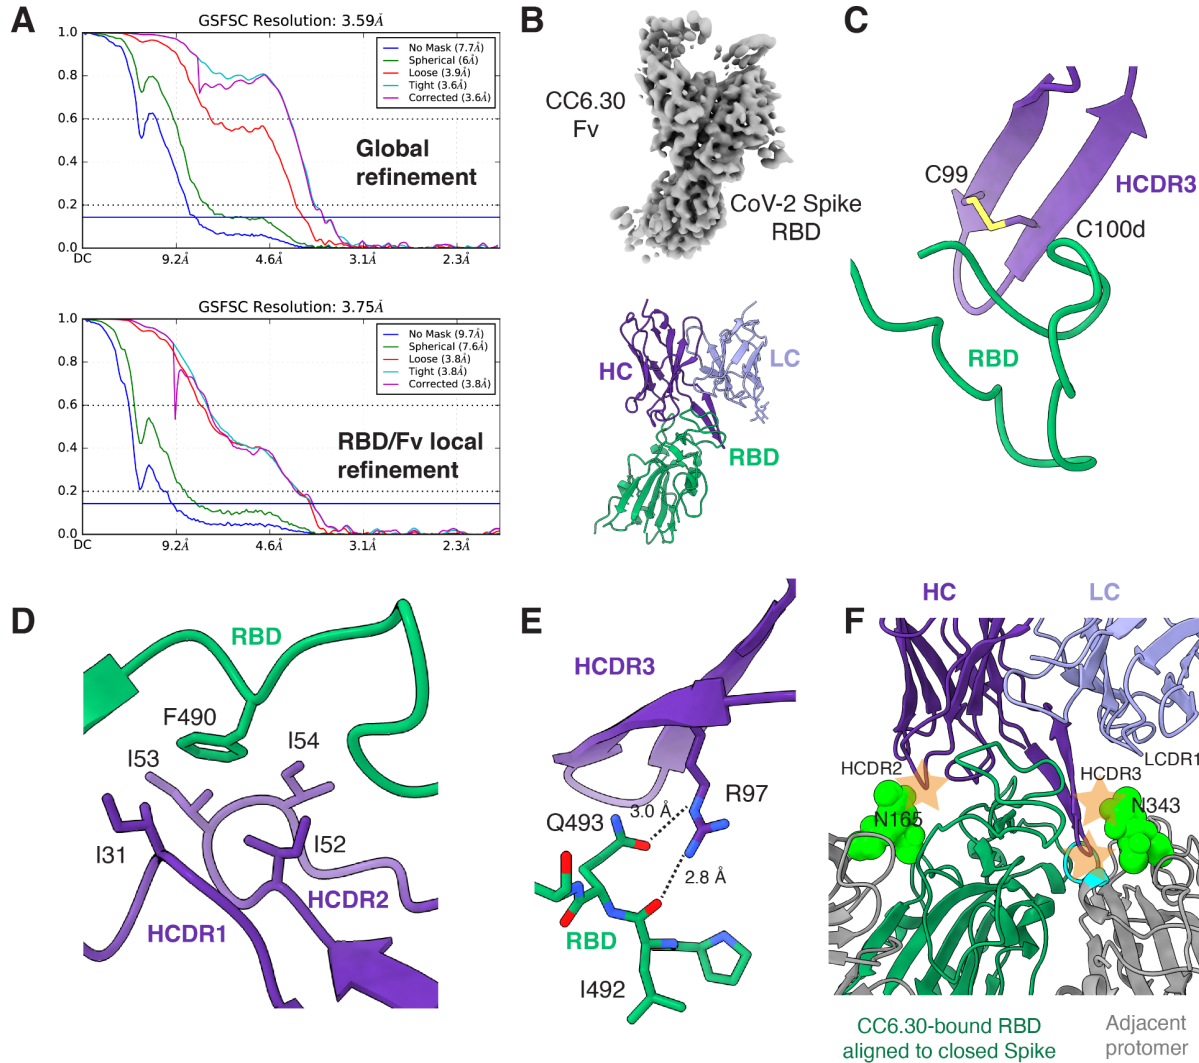

953

954

955 **Supplementary Fig.1. CryoEM reconstruction of nAb CC6.30 in complex with SARS-CoV-2**  
 956 **HPM7 Spike. Related to Fig.1. a**, Fourier shell correlation (FSC) of global refinement (*top*) and  
 957 RBD/Fv local refinement (*bottom*) of the CC6.30:HPM7 complex. **b**, Local refinement map (*top*) and  
 958 model (*bottom*). **c**, CC6.30 HCDR3 intrachain disulfide bond. **d**, Hydrophobic interactions between  
 959 RBD F490 and multiple CC6.30 heavy chain residues. **e**, Putative hydrogen bonds (dashed lines)  
 960 between CC6.30 HCDR3 R97 and RBD. **f**, Superposition of RBD:CC6.30 onto a closed (3 down  
 961 RBDs) Spike predicts multiple clashes (orange stars) with glycans (N165, N343) and peptide  
 962 (residues 367-371; cyan) with the adjacent protomer.

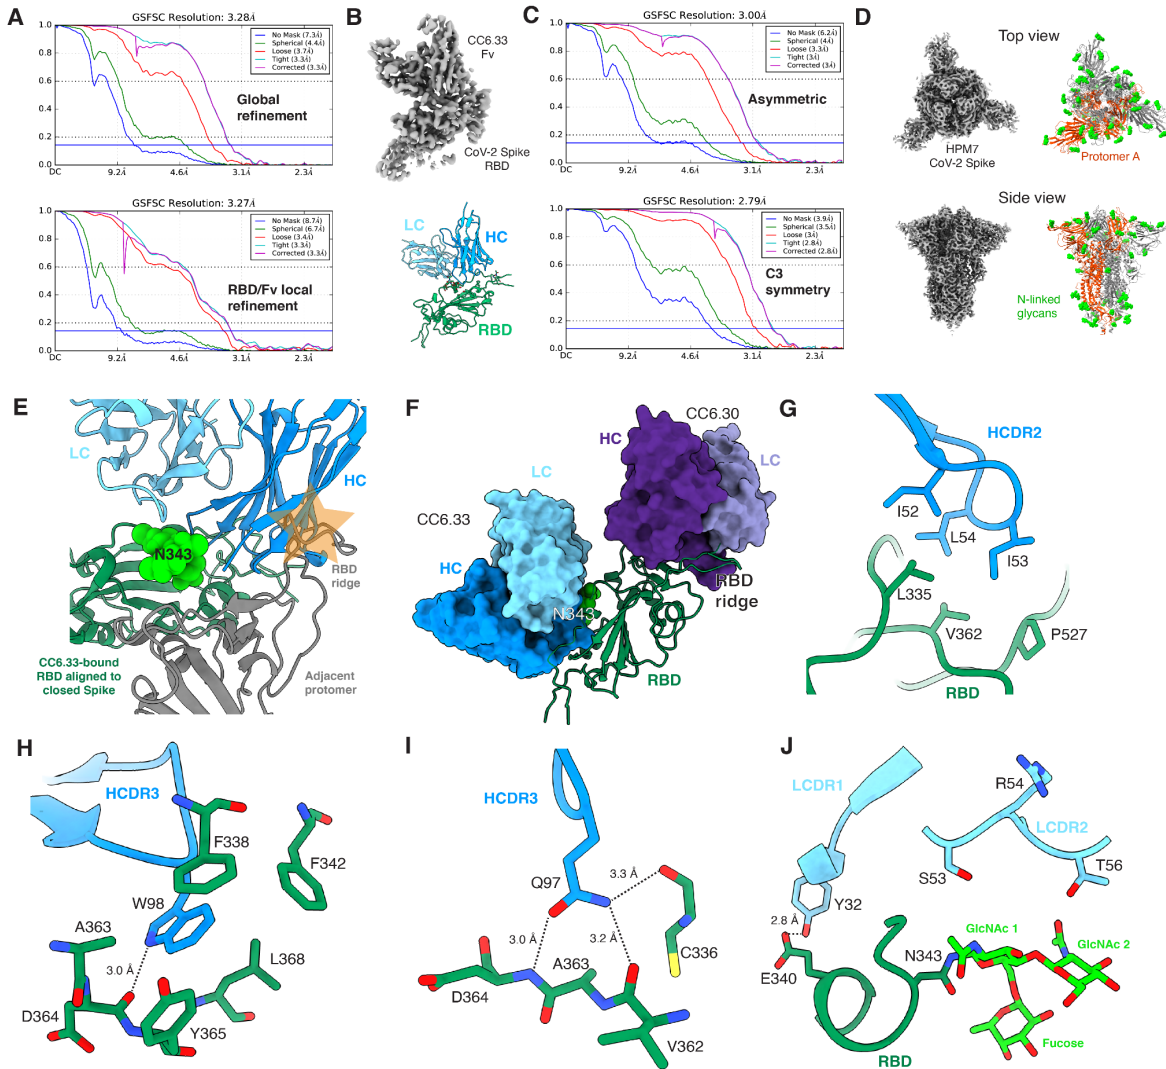

963

964

**Supplementary Fig.2. CryoEM reconstruction of nAb CC6.33 in complex with SARS-CoV-2 HPM7 Spike. Related to Fig.2. a**, Fourier shell correlation (FSC) of global refinement (*top*) and RBD/Fv local refinement (*bottom*) of the CC6.33:HPM7 complex. **b**, Local refinement map (*top*) and model (*bottom*). **c**, Fourier shell correlation (FSC) of asymmetric (*top*) and C3-symmetric (*bottom*) ligand-free HPM7 SARS-CoV-2 Spike reconstructions. **d**, Map and model of ligand-free HPM7 SARS-CoV-2 Spike C3-symmetric reconstruction. **e**, Superposition of RBD:CC6.33 onto a closed (3 down RBDs) Spike predicts a clash with the RBD ridge of an adjacent protomer that is relieved with slight opening of the apex. **f**, Modeling of CC6.30 and CC6.33 on the same RBD reveals non-overlapping epitopes. **g**, Hydrophobic packing between CC6.33 HCDR2 and the RBD. **h**, Interactions between CC6.33 HCDR3 Trp98 and the RBD. **i**, Putative hydrogen bonding between CC6.33 HCDR3 Gln97 and the RBD. **j**, Interface between CC6.33 LCDR1 and LCDR2, and RBD, including glycan N343.

975

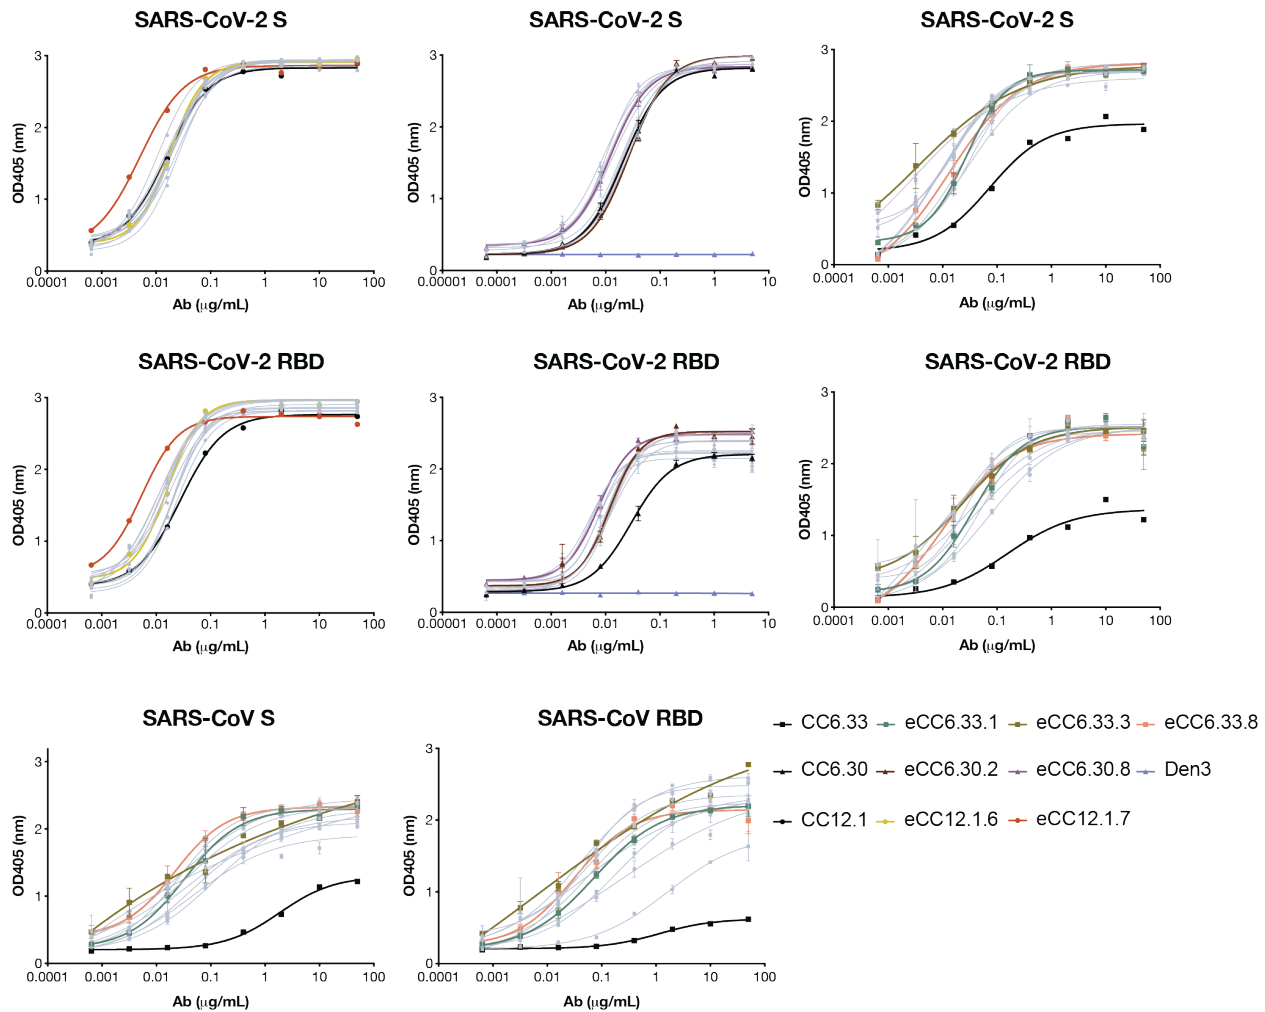

976

977

978 **Supplementary Fig.3. Engineered antibody variants ELISA binding to SARS-CoV-2 and**  
979 **SARS-CoV-1 S/RBD proteins. Related to Fig.3. Parental and engineered Abs were evaluated**  
980 **binding against his-tagged recombinant S/RBD protein. Parental mAbs were colored in black while**  
981 **some key enAbs were colored according to the key. The rest of enAbs were colored in grey.**  
982 **Antibodies were tested in duplicates. Error bars represent standard deviations.**

983

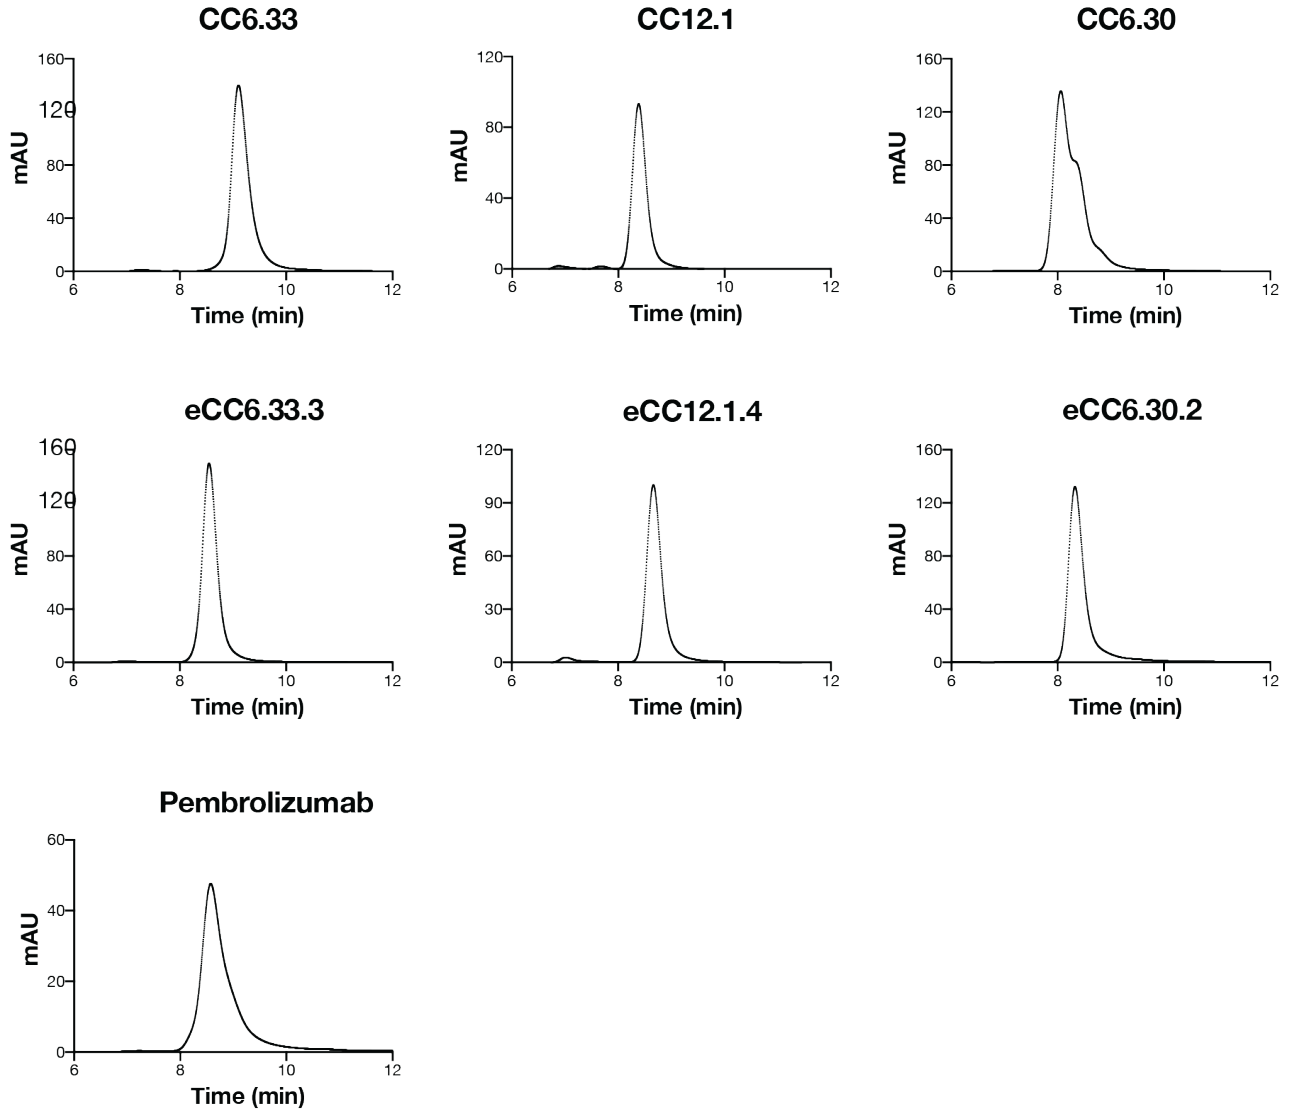

984

985

986

987 **Supplementary Fig.4. Size exclusion chromatography analysis of parental and engineered**  
988 **SARS-CoV-2 mAbs. Related to Fig.3.** The antibodies were analyzed by size exclusion  
989 chromatography using the 1260 Infinity II (Agilent). 15 uL of each antibody was injected into the  
990 TSKgel SuperSW mAb column at 2 mg/mL. An FDA-approved mAb Pembrolizumab was included  
991 as control.

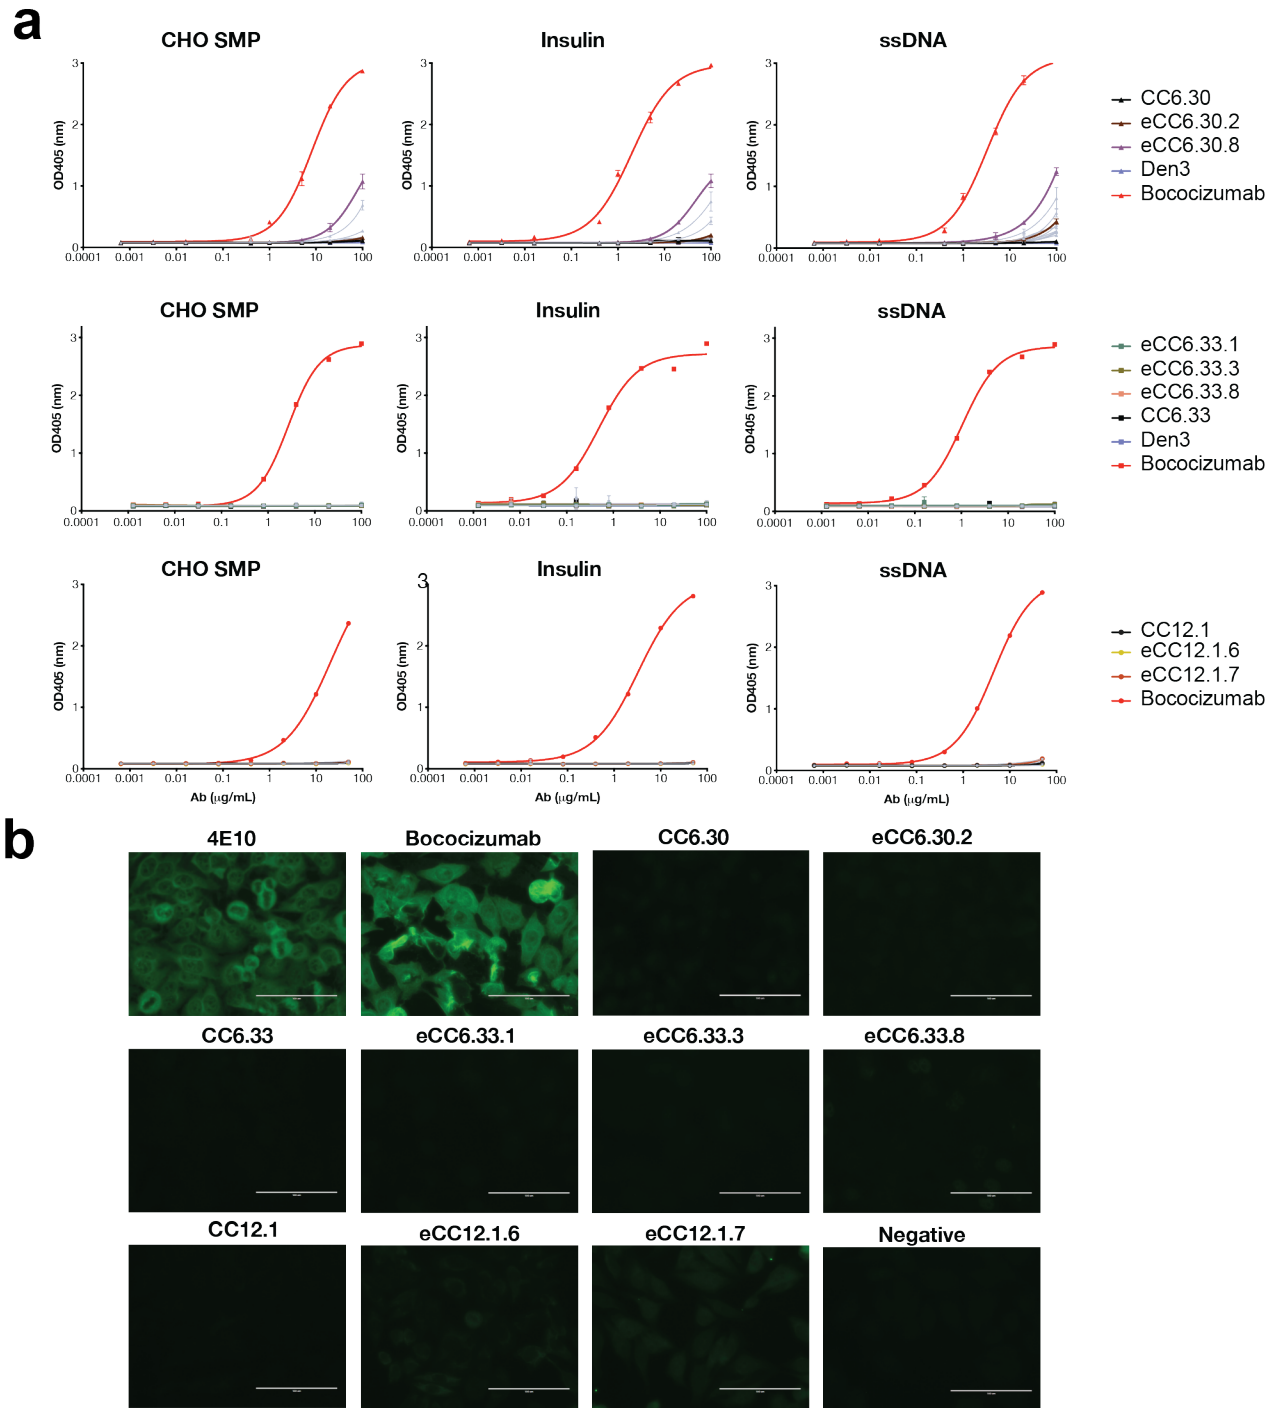

992

993

994 **Supplementary Fig.5. Polyreactivity of parental and enhanced nAbs by SPR. Related to Fig.3.**

995 **a**, ELISA of eCC6.30, eCC6.33, eCC12.1 variants and parental clones to CHO solubilized  
 996 membrane proteins, human insulin, and ssDNA. Bococizumab serves as positive control while  
 997 Den3 serves as negative control. Error bars represent standard deviations. **b**, HEp2 epithelial cells  
 998 staining with mAbs at 100  $\mu\text{g}/\text{mL}$ . 4E10 and Bococizumab serve as positive control.

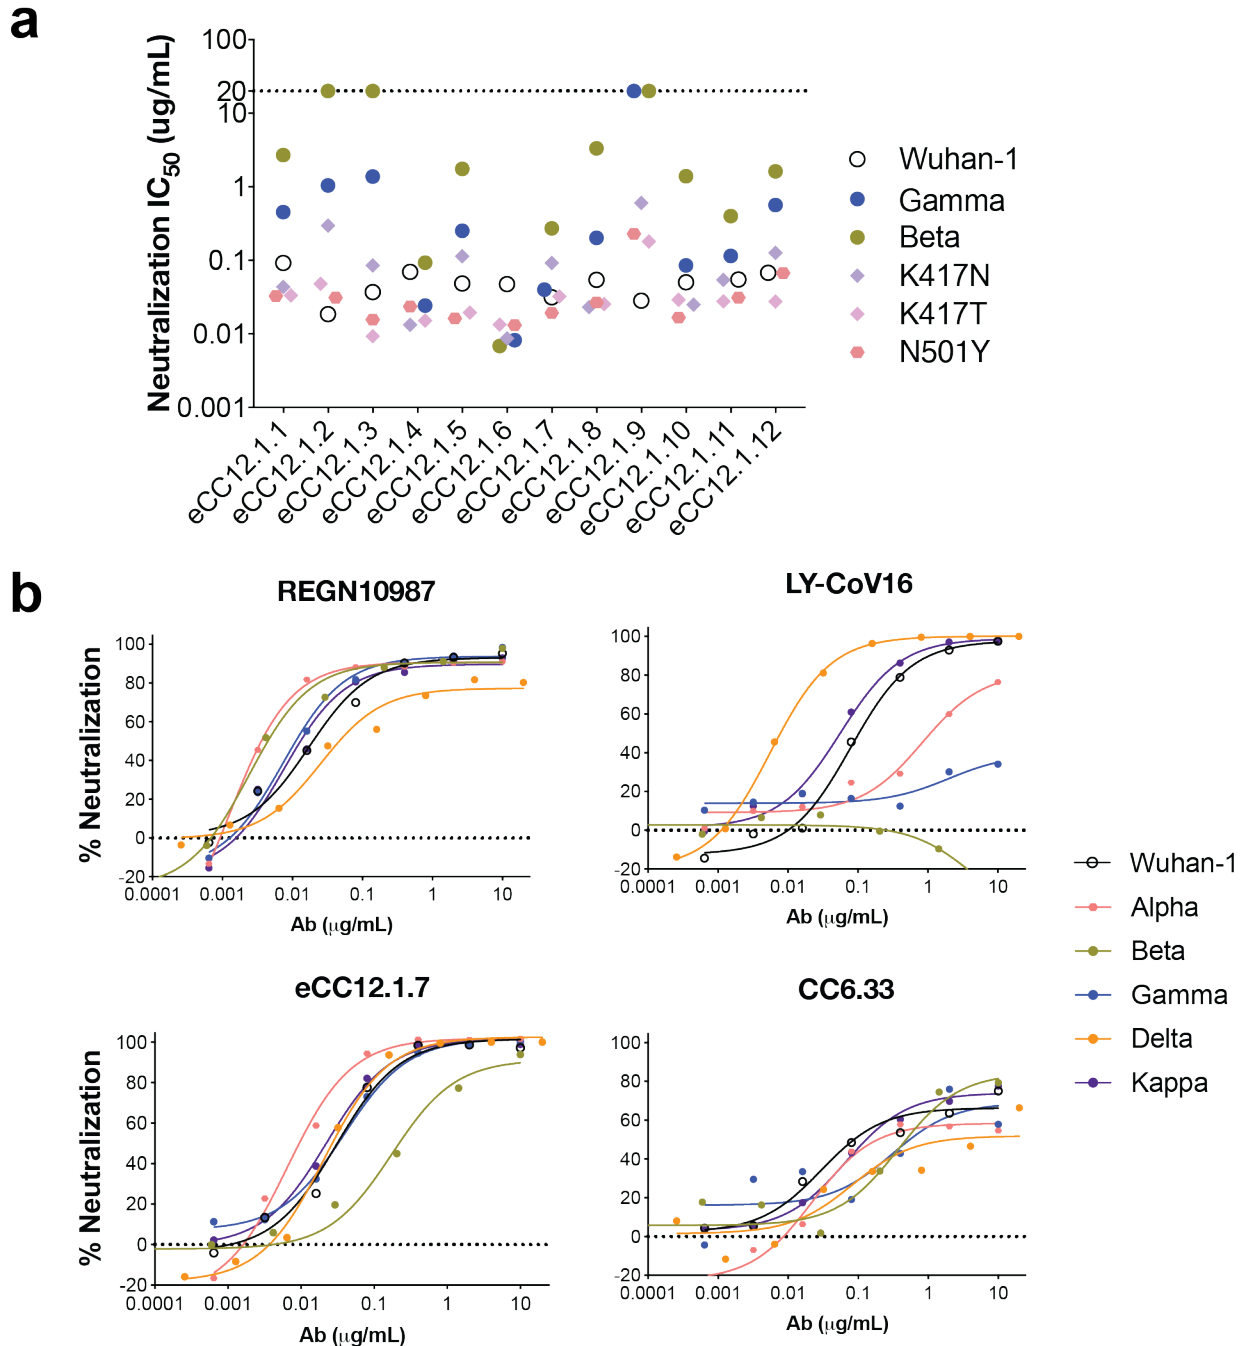

999

1000

1001

1002

1003

1004

1005

**Supplementary Fig.6. Neutralization of mAbs against VOCs. Related to Fig.4.** **a**, Neutralization  $IC_{50}$  of 12 eCC12.1 variants against Wuhan-1, K417N, K417T, N501Y, Beta, and Gamma variants. Antibody started at 20  $\mu\text{g/mL}$  and was tested in duplicates. **b**, Neutralization curves of REGN10987, LY-CoV16, CC6.33 and eCC12.1.7 against Wuhan-1 as well as VOCs. Virus strains were colored according to the key.

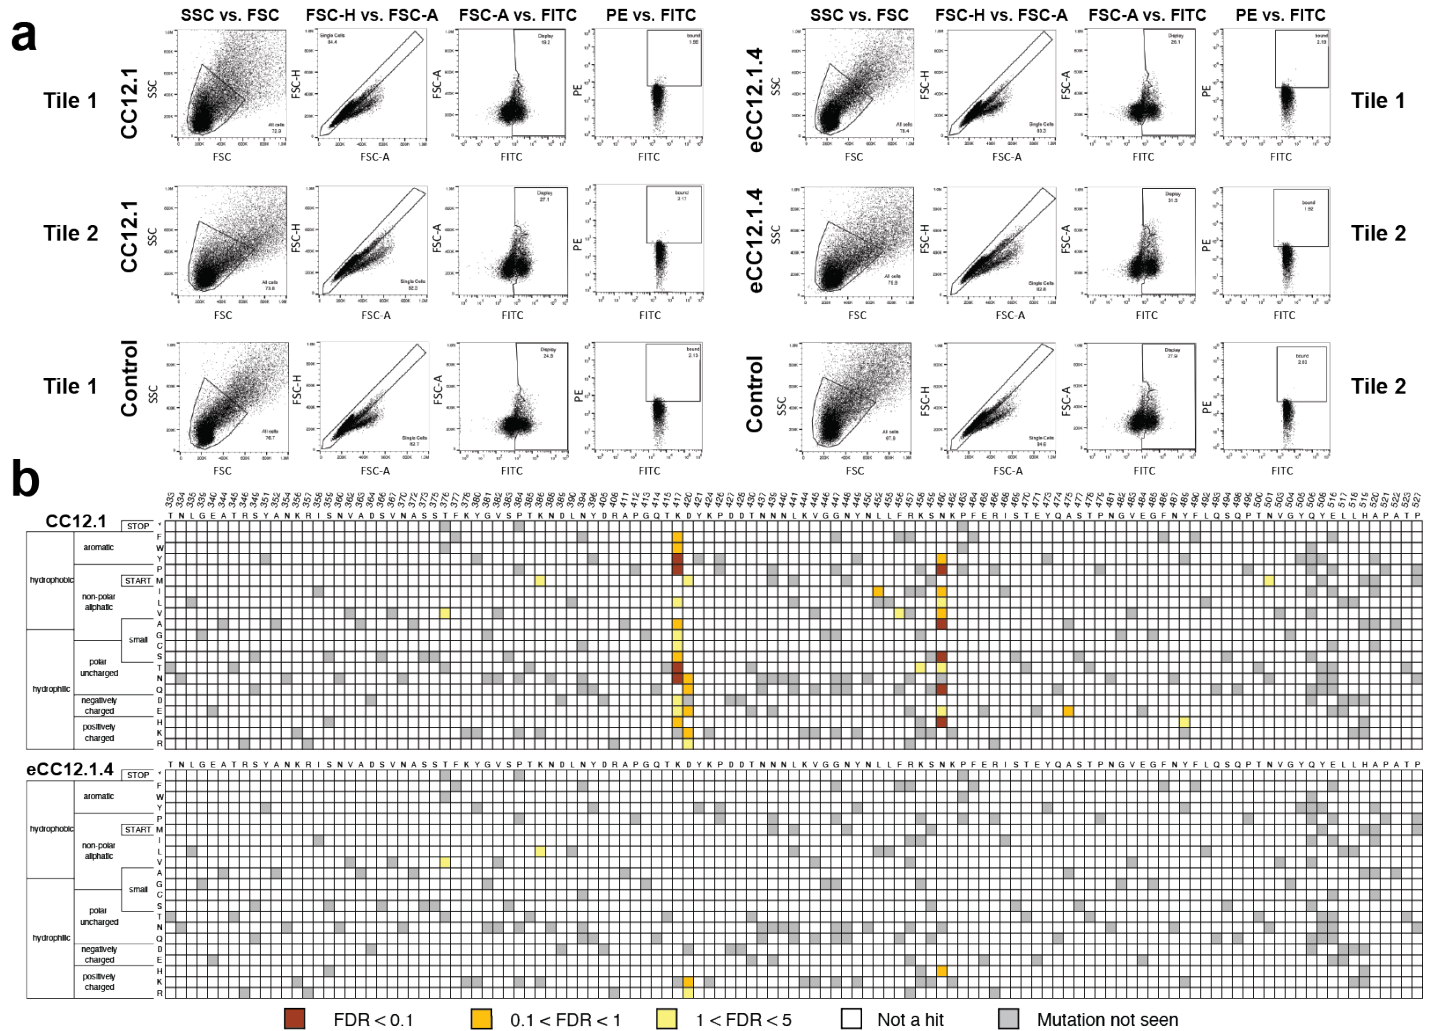

1006

1007

1008

1009

1010

1011

1012

**Supplementary Fig.7. Identification of SARS-CoV-2 RBD escape mutants using yeast screening. Related to Fig.5.** **a**, Gating strategy and gates set for the escape mutant analysis for CC12.1 and eCC12.1.4. Control is the population of yeast cells without labeling by either biotinylated ACE2 or a given nAb. **b**, Heatmap showing predicted RBD (residues 333-527) escape mutants for CC12.1 and eCC12.1.4 in yellow to burnt orange with varying levels of confidence according to the key.

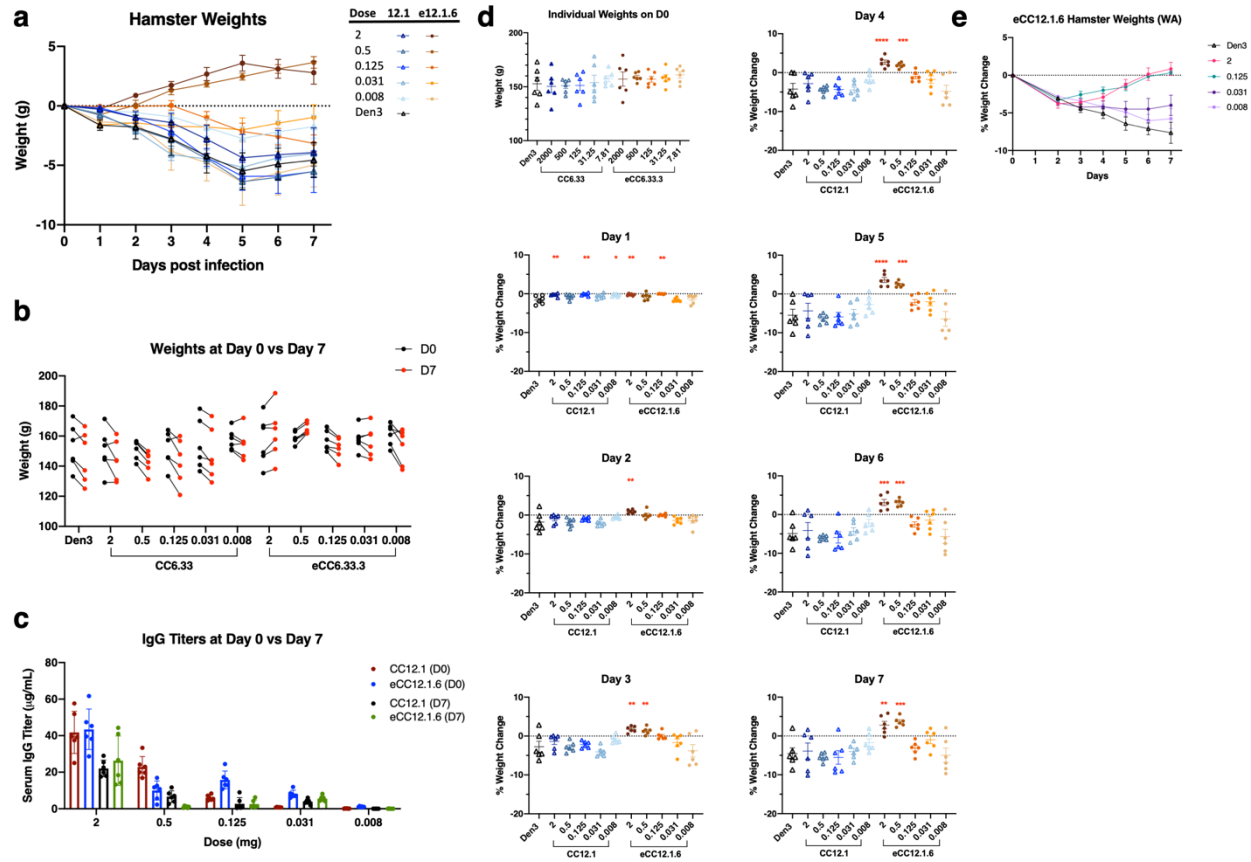

1013

1014

1015 **Supplementary Fig.8. Supplemental Animal Protection Studies, CC12.1 and eCC12.1.6.**

1016 **Related to Fig.6.** a, Weight trends of all groups included in the CC12.1 vs eCC12.1.6 prophylactic  
 1017 protection study. b, Weights of animals at time of challenge (Day 0) compared to weights at time of  
 1018 sacrifice (Day 7). c, Serum human IgG concentration at time of infection (Day 0) compared to  
 1019 sacrifice (Day 7). d, Percent weight loss by day compared to weights recorded at time of infection  
 1020 at day 0. e, Weight trend of animals administered with eCC12.1.6 and subsequently challenged  
 1021 with  $1 \times 10^5$  PFU of SARS-CoV-2 (USA-WA1/2020) three days later.



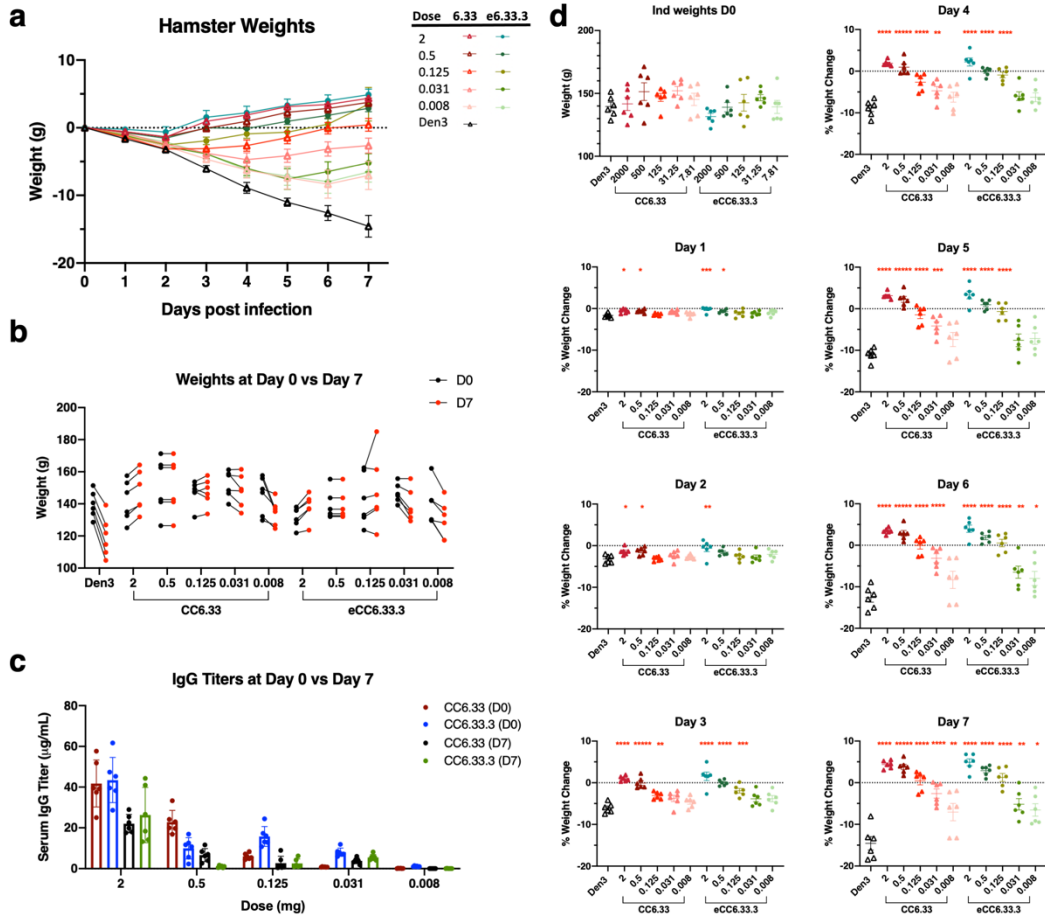

1022

1023

1024

1025 **Supplementary Fig.9. Supplemental Animal Protection Studies, CC6.33 and eCC6.33.3.**

1026 **Related to Fig.6. a,** Weight trends of all groups included in the CC6.33 vs eCC6.33.3 protection

1027 study. **b,** Weights of animals at time of challenge (Day 0) compared to weights at time of sacrifice

1028 (Day 7). **c,** Serum human IgG concentration at time of infection (Day 0) compared to sacrifice (Day

1029 7). **d,** Percent weight loss by day compared to individual weights recorded at time of infection at

1030 day 0.

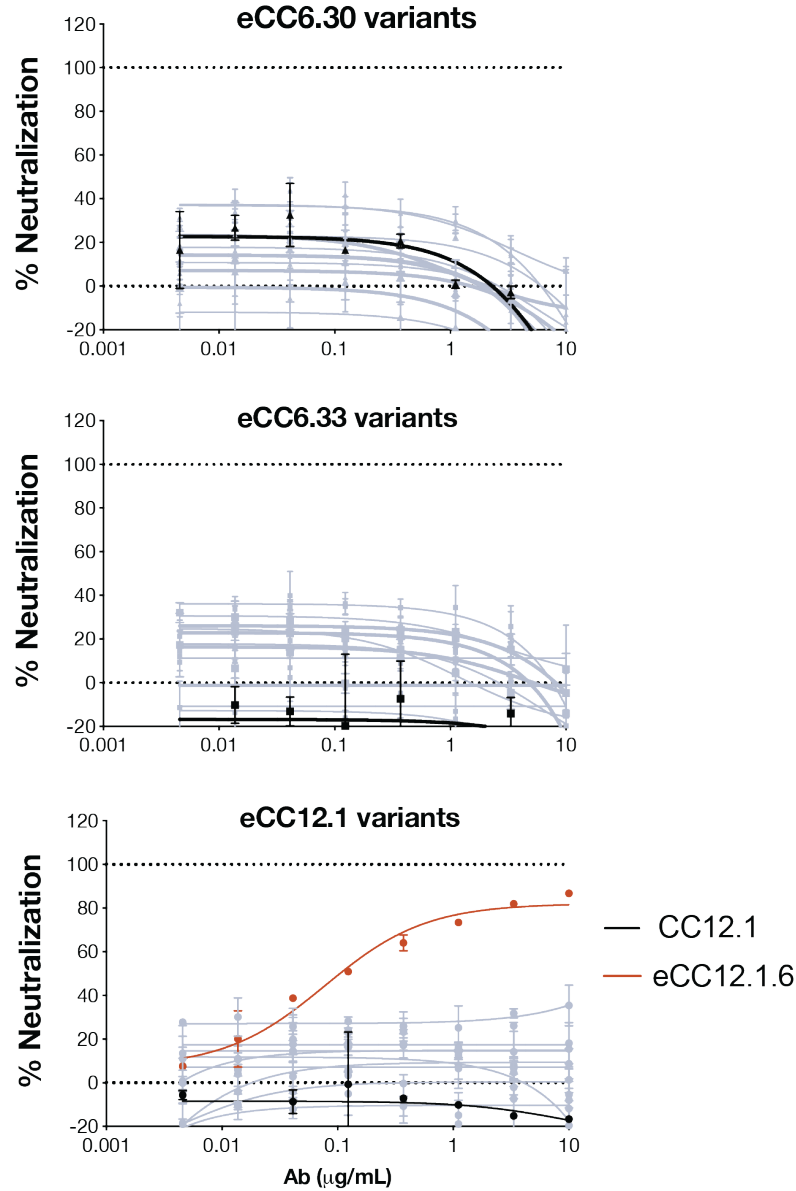

1031

1032

1033

1034 **Supplementary Fig.10. Neutralization of enAbs against the Omicron variant. Related to Fig.7.**

1035 Neutralization curves of eCC6.33, eCC6.30, and eCC12.1 variants against pseudotyped Omicron

1036 VOC. Parental antibodies were highlighted in black whereas enAbs were in grey. eCC12.1.6 was

1037 highlighted according to the key. Error bars represent standard deviations

| <b>Map</b>                                     | <b>CC6.30 Fab + SARS-CoV-2 S HPM7 (Non-uniform refinement)</b> | <b>CC6.30 Fab + SARS-CoV-2 S HPM7 (RBD/Fv local refinement)</b> |
|------------------------------------------------|----------------------------------------------------------------|-----------------------------------------------------------------|
| EMDB                                           | EMD-24697                                                      | EMD-24699                                                       |
| <b>Data collection</b>                         |                                                                |                                                                 |
| Microscope                                     | FEI Titan Krios                                                | FEI Titan Krios                                                 |
| Voltage (kV)                                   | 300                                                            | 300                                                             |
| Detector                                       | Gatan K2 Summit                                                | Gatan K2 Summit                                                 |
| Recording mode                                 | Counting                                                       | Counting                                                        |
| Nominal magnification                          | 29,000                                                         | 29,000                                                          |
| Movie micrograph pixel size (Å)                | 1.03                                                           | 1.03                                                            |
| Dose rate (e <sup>-</sup> /[(camera pixel)*s]) | 5.414                                                          | 5.414                                                           |
| Number of frames per movie micrograph          | 39                                                             | 39                                                              |
| Frame exposure time (ms)                       | 250                                                            | 250                                                             |
| Movie micrograph exposure time (s)             | 9.75                                                           | 9.75                                                            |
| Total dose (e <sup>-</sup> /Å <sup>2</sup> )   | 50                                                             | 50                                                              |
| Defocus range (µm)                             | -0.6 to -1.5                                                   | -0.6 to -1.5                                                    |
| <b>EM data processing</b>                      |                                                                |                                                                 |
| Number of movie micrographs                    | 3,348                                                          | 3,348                                                           |
| Number of molecular projection images in map   | 55,248                                                         | 94,532                                                          |
| Symmetry                                       | C1                                                             | C1                                                              |
| Map resolution (FSC 0.143; Å)                  | 3.6                                                            | 3.8                                                             |
| Map sharpening B-factor (Å <sup>2</sup> )      | -79.9                                                          | -50                                                             |
| <b>Structure Building and Validation</b>       |                                                                |                                                                 |
| <i>Number of atoms in deposited model</i>      |                                                                |                                                                 |
| SARS-CoV-2 S protein                           | 24,577                                                         | 1,388                                                           |
| Glycans                                        | 560                                                            | 42                                                              |
| CC6.30 Fv                                      | 3,536                                                          | 1,768                                                           |
| MolProbity score                               | 0.91                                                           | 1.19                                                            |
| Clashscore                                     | 0.81                                                           | 0.96                                                            |
| Map correlation coefficient                    | 0.72                                                           | 0.72                                                            |
| EMRinger score                                 | 2.57                                                           | 2.53                                                            |
| <i>RMSD from ideal</i>                         |                                                                |                                                                 |
| Bond length (Å)                                | 0.02                                                           | 0.02                                                            |
| Bond angles (°)                                | 1.81                                                           | 1.88                                                            |
| <i>Ramachandran plot</i>                       |                                                                |                                                                 |
| Favored (%)                                    | 97.12                                                          | 93.92                                                           |
| Allowed (%)                                    | 2.88                                                           | 6.08                                                            |
| Outliers (%)                                   | 0                                                              | 0                                                               |
| Side chain rotamer outliers (%)                | 0.06                                                           | 0                                                               |
| PDB                                            | 7ru5                                                           | 7ru8                                                            |

1038

1039

1040

**Supplementary Table 1. CryoEM data collection, refinement and model building statistics (CC6.30 dataset). Related to Fig.1.**

| Map                                            | CC6.33 IgG + SARS-CoV-2 S HPM7 (Non-uniform refinement) | CC6.33 IgG + SARS-CoV-2 S HPM7 (RBD/Fv local refinement) | SARS-CoV-2 S HPM7 (C3 symmetry) | SARS-CoV-2 S HPM7 (C1 symmetry) |
|------------------------------------------------|---------------------------------------------------------|----------------------------------------------------------|---------------------------------|---------------------------------|
| EMDB                                           | EMD-24695                                               | EMD-24696                                                | EMD-24693                       | EMD-24694                       |
| <b>Data collection</b>                         |                                                         |                                                          |                                 |                                 |
| Microscope                                     | FEI Titan Krios                                         | FEI Titan Krios                                          | FEI Titan Krios                 | FEI Titan Krios                 |
| Voltage (kV)                                   | 300                                                     | 300                                                      | 300                             | 300                             |
| Detector                                       | Gatan K2 Summit                                         | Gatan K2 Summit                                          | Gatan K2 Summit                 | Gatan K2 Summit                 |
| Recording mode                                 | Counting                                                | Counting                                                 | Counting                        | Counting                        |
| Nominal magnification                          | 29,000                                                  | 29,000                                                   | 29,000                          | 29,000                          |
| Movie micrograph pixel size (Å)                | 1.03                                                    | 1.03                                                     | 1.03                            | 1.03                            |
| Dose rate (e <sup>-</sup> /[(camera pixel)*s]) | 5.414                                                   | 5.414                                                    | 5.414                           | 5.414                           |
| Number of frames per movie micrograph          | 39                                                      | 39                                                       | 39                              | 39                              |
| Frame exposure time (ms)                       | 250                                                     | 250                                                      | 250                             | 250                             |
| Movie micrograph exposure time (s)             | 9.75                                                    | 9.75                                                     | 9.75                            | 9.75                            |
| Total dose (e <sup>-</sup> /Å <sup>2</sup> )   | 50                                                      | 50                                                       | 50                              | 50                              |
| Defocus range (µm)                             | -0.5 to -1.5                                            | -0.5 to -1.5                                             | -0.5 to -1.5                    | -0.5 to -1.5                    |
| <b>EM data processing</b>                      |                                                         |                                                          |                                 |                                 |
| Number of movie micrographs                    | 3,465                                                   | 3,465                                                    | 3,465                           | 3,465                           |
| Number of molecular projection images in map   | 47,461                                                  | 96,012                                                   | 55,575                          | 55,575                          |
| Symmetry                                       | C1                                                      | C1                                                       | C3                              | C1                              |
| Map resolution (FSC 0.143; Å)                  | 3.3                                                     | 3.3                                                      | 2.8                             | 3                               |
| Map sharpening B-factor (Å <sup>2</sup> )      | -59.4                                                   | -33.9                                                    | -66.9                           | -54.6                           |
| <b>Structure Building and Validation</b>       |                                                         |                                                          |                                 |                                 |
| <i>Number of atoms in deposited model</i>      |                                                         |                                                          |                                 |                                 |
| SARS-CoV-2 S protein                           | 24,175                                                  | 1,610                                                    | 25,737                          | 25,778                          |
| Glycans                                        | 584                                                     | 52                                                       | 756                             | 868                             |
| CC6.33 Fv                                      | 3,398                                                   | 1,720                                                    | 0                               | 0                               |
| MolProbity score                               | 1                                                       | 0.89                                                     | 0.91                            | 0.83                            |
| Clashscore                                     | 1.04                                                    | 0.6                                                      | 0.77                            | 0.46                            |
| Map correlation coefficient                    | 0.81                                                    | 0.8                                                      | 0.83                            | 0.83                            |
| EMRinger score                                 | 2.55                                                    | 3.98                                                     | 5.05                            | 4.15                            |
| <i>RMSD from ideal</i>                         |                                                         |                                                          |                                 |                                 |
| Bond length (Å)                                | 0.02                                                    | 0.02                                                     | 0.02                            | 0.02                            |
| Bond angles (°)                                | 1.85                                                    | 1.9                                                      | 1.77                            | 1.78                            |
| <i>Ramachandran plot</i>                       |                                                         |                                                          |                                 |                                 |
| Favored (%)                                    | 96.82                                                   | 96.9                                                     | 96.97                           | 97.04                           |
| Allowed (%)                                    | 3.18                                                    | 3.1                                                      | 3.03                            | 2.96                            |
| Outliers (%)                                   | 0                                                       | 0                                                        | 0                               | 0                               |
| Side chain rotamer outliers (%)                | 0.32                                                    | 0.55                                                     | 0                               | 0.14                            |
| PDB                                            | 7ru3                                                    | 7ru4                                                     | 7ru1                            | 7ru2                            |

1041

1042 **Supplementary Table 2. CryoEM data collection, refinement and model building statistics**

1043 **(CC6.33 dataset). Related to Fig.2.**

| mAb ID        | HCDR Sequence                   |                            |                                  | LCDR Sequence         |                   |                             | SPR against SARS2 RBD |          |          | Neutralization Potency (ug/mL) |       |      |
|---------------|---------------------------------|----------------------------|----------------------------------|-----------------------|-------------------|-----------------------------|-----------------------|----------|----------|--------------------------------|-------|------|
|               | H-CDR1                          | H-CDR2                     | H-CDR3                           | L-CDR1                | L-CDR2            | L-CDR3                      | ka [1/Ms]             | kd [1/s] | KD [M]   | SARS1                          | SARS2 | MPN  |
| <b>CC12.1</b> | SGLTVSSNYMS                     | VIYSGGST                   | ARLDVYGLDV                       | ASQGISSY              | YAASLQSS          | QQLNSYPPKF                  | 6.95E+05              | 4.12E-03 | 5.92E-09 | >10                            | 0.017 | 100% |
| eCC12.1.1     | SGLTVSSNYM <b>V</b>             | VIYSGG <b>S</b> I          | ARLDVYGLDV                       | ASQGISSY              | YAASLQ <b>W</b>   | QQLNSYPP <b>P</b> F         | 7.81E+05              | 7.76E-05 | 9.92E-11 | >10                            | 0.012 | 100% |
| eCC12.1.2     | <b>F</b> GLTVSSNYMS             | <b>Q</b> IYSGGST           | ARLDVY <b>G</b> VDV              | ASQGISSY              | YAAS <b>T</b> IQS | QQLNSYPP <b>P</b> F         | 7.51E+05              | 2.35E-04 | 3.13E-10 | >10                            | 0.014 | 100% |
| eCC12.1.3     | SGLTVSSNYM <b>N</b>             | VIYSGGST                   | ARLDVY <b>G</b> VDV              | ASQGI <b>S</b> H      | YAAS <b>Y</b> LQS | QQLNSYPP <b>K</b> P         | 7.08E+05              | 1.11E-04 | 1.57E-10 | >10                            | 0.009 | 100% |
| eCC12.1.4     | SGLTV <b>S</b> LNYS             | <b>E</b> IYSGGST           | ARLDVYGLDV                       | ASQGISSY              | YAASLQ <b>W</b>   | QQLNSYPP <b>P</b> F         | 8.21E+05              | 2.35E-04 | 2.86E-10 | >10                            | 0.013 | 100% |
| eCC12.1.5     | SGLTVSSNYM <b>V</b>             | VIY <b>P</b> GGST          | ARLDVY <b>G</b> IDV              | ASQGI <b>S</b> N      | YAASLQ <b>W</b>   | <b>V</b> QLNSYPP <b>K</b> F | 3.93E+06              | 1.29E-04 | 3.28E-11 | >10                            | 0.007 | 100% |
| eCC12.1.6     | SGLTVSSNYM <b>A</b>             | VIY <b>A</b> GGST          | ARLDVY <b>G</b> IDV              | ASQGI <b>S</b> W      | YAASLQ <b>W</b>   | QQLNSYPP <b>K</b> S         | 1.04E+06              | 9.62E-05 | 9.26E-11 | >10                            | 0.008 | 100% |
| eCC12.1.7     | SGLTVSSNYM <b>T</b>             | VIY <b>A</b> GGST          | ARLDVY <b>G</b> VDV              | ASQGI <b>S</b> R      | YAASLQ <b>Y</b>   | QQLNSYPP <b>K</b> Y         | 8.48E+05              | 1.65E-04 | 1.95E-10 | >10                            | 0.005 | 100% |
| eCC12.1.8     | SGLTVSSNYM <b>L</b>             | <b>L</b> IYSGGST           | ARLDVY <b>G</b> VDV              | ASQGISSY              | YAASLQ <b>R</b>   | QQLNSYPP <b>P</b> F         | 7.49E+05              | 9.36E-05 | 1.25E-10 | >10                            | 0.011 | 100% |
| eCC12.1.9     | SGL <b>W</b> VSSNYMS            | <b>Q</b> IYSGGST           | ARLDVY <b>G</b> IDV              | ASQGI <b>S</b> H      | YAAS <b>N</b> LQS | QQLNSYPP <b>P</b> F         | 6.06E+05              | 1.99E-04 | 3.28E-10 | >10                            | 0.020 | 100% |
| eCC12.1.10    | <b>F</b> GLTVSSNYMS             | <b>Q</b> IYSGGST           | ARLDVY <b>G</b> VDV              | ASQGISSY              | YAAS <b>T</b> IQS | QQLNSYPP <b>P</b> F         | 2.73E+06              | 6.04E-05 | 2.22E-11 | >10                            | 0.009 | 100% |
| eCC12.1.11    | SGLTVSSNYM <b>V</b>             | <b>Q</b> IYSGGST           | ARLDVYGLDV                       | ASQGISSY              | YAASLQ <b>H</b>   | QQLNSYPP <b>P</b> F         | 9.04E+05              | 1.01E-04 | 1.11E-10 | >10                            | 0.008 | 100% |
| eCC12.1.12    | SGLTVSSNYM <b>T</b>             | VIY <b>P</b> GGST          | ARLDV <b>F</b> GLDV              | <b>V</b> SQGISSY      | <b>Y</b> FASTLQS  | QQLNSYPP <b>P</b> F         | 3.64E+07              | 9.46E-05 | 2.60E-12 | >10                            | 0.017 | 100% |
| <b>CC6.33</b> | KASGGTFSSSAIS                   | GIIPILDITN                 | LRNQWDLLV                        | RASQSVSSSYLA          | YGASSRAT          | QHYGSSSLWT                  | 5.93E+04              | 1.52E-02 | 2.57E-07 | 2.269                          | 0.228 | 81%  |
| eCC6.33.1     | KASGG <b>I</b> FSSSAIS          | GIIPILD <b>I</b> SN        | <b>L</b> TNQWDLLV                | RASQ <b>R</b> VSSSYLA | YGA <b>E</b> SRAT | QHYGSSSLWT                  | 5.18E+04              | 7.91E-04 | 1.53E-08 | 0.024                          | 0.006 | 100% |
| eCC6.33.2     | KAPGGTFSSSAIS                   | <b>T</b> IIPILDITN         | <b>Q</b> RNQWDLLV                | RASQSV <b>S</b> SYLA  | YGA <b>E</b> SRAT | QHYGSS <b>R</b> WT          | 8.97E+04              | 1.12E-03 | 1.25E-08 | 0.031                          | 0.008 | 98%  |
| eCC6.33.3     | KAPGGTFSSSAIS                   | GIIPILD <b>I</b> TH        | LRNQWDLLV                        | RASQ <b>D</b> VSSSYLA | YGA <b>E</b> SRAT | QHYGSS <b>E</b> WT          | 1.16E+05              | 9.53E-04 | 8.18E-09 | 0.023                          | 0.008 | 95%  |
| eCC6.33.4     | KASGG <b>I</b> FSSSAIS          | GIIPILDITN                 | <b>L</b> TNQWDLLV                | RASQSVSSSYLA          | YGA <b>E</b> SRAT | QHYGSS <b>A</b> WT          | -                     | -        | -        | 0.037                          | 0.016 | 95%  |
| eCC6.33.5     | KAVGGTFSSSAI <b>Y</b>           | GIIPILD <b>I</b> AN        | LRNQWDL <b>V</b> V               | <b>H</b> ASQSVSSSYLA  | YGA <b>E</b> SRAT | QHYGSS <b>T</b> WT          | 2.37E+05              | 4.11E-03 | 1.73E-08 | 0.016                          | 0.004 | 95%  |
| eCC6.33.6     | KAPGGTFSSSAIS                   | GIIPILD <b>I</b> T         | LRNQWDL <b>L</b> I               | RASQSVSS <b>H</b> YLA | YGASSR <b>Y</b> T | QHYGSS <b>H</b> WT          | 1.26E+05              | 1.67E-03 | 1.33E-08 | 0.012                          | 0.020 | 98%  |
| eCC6.33.7     | KASGG <b>I</b> FSSSAIS          | GIIPILD <b>Y</b> TN        | LRNQWDLLV                        | RASQ <b>E</b> VSSSYLA | YGA <b>E</b> SRAT | QHYGSS <b>A</b> WT          | 2.20E+05              | 1.67E-03 | 7.60E-09 | 0.094                          | 0.017 | 100% |
| eCC6.33.8     | K <b>V</b> SGGTFSSSAIS          | <b>K</b> IIPILDITN         | LRNQWDLLV                        | RASQSVSS <b>H</b> YLA | YGA <b>E</b> SRAT | QHYGSS <b>P</b> WT          | 1.74E+05              | 4.25E-04 | 2.44E-09 | 0.013                          | 0.010 | 100% |
| eCC6.33.9     | K <b>S</b> SGGTFSSSA <b>Y</b> S | <b>T</b> IIPILDITN         | <b>Q</b> RNQWDLIV                | RASQ <b>W</b> VSSSYIA | YGA <b>E</b> SRAT | QHYGSS <b>S</b> WT          | 1.53E+05              | 2.18E-03 | 1.43E-08 | 0.054                          | 0.014 | 97%  |
| eCC6.33.10    | KAPGGTFSSSAIS                   | GIIPILD <b>I</b> TH        | LRNQWDLLV                        | RASQSVSSSYLA          | YGA <b>E</b> SRAT | QHYGSS <b>V</b> WT          | 1.84E+05              | 1.70E-03 | 9.24E-09 | 0.010                          | 0.012 | 99%  |
| eCC6.33.11    | KISGG <b>Y</b> FSSSAIS          | GIIPVLDITN                 | <b>L</b> TNQWDLLV                | <b>S</b> ASQSVSSSYLA  | YGA <b>E</b> SRAT | QHYGSS <b>H</b> WT          | 1.58E+05              | 3.76E-04 | 2.38E-09 | 0.020                          | 0.010 | 100% |
| eCC6.33.12    | KASGG <b>L</b> FSSSAIS          | GIIPILDITN                 | <b>L</b> TNQWDLLV                | RASQSVSSSYLA          | YGA <b>E</b> SRAT | QHYGSS <b>R</b> WT          | 1.70E+05              | 1.38E-03 | 8.11E-09 | 0.061                          | 0.013 | 99%  |
| <b>CC6.30</b> | KASGGTFSIYAIT                   | GIIP <b>I</b> GTAN         | RDFRYCSSTRCYFWF                  | RASQSISSYL            | YAASSLQSS         | QQSYSTPRT                   | 2.52E+06              | 4.30E-03 | 1.71E-09 | >10                            | 0.006 | 100% |
| eCC6.30.1     | KASGGTFSIYAIT                   | <b>N</b> IIP <b>I</b> GTAN | RDFRYCSSTRCYFWF                  | RASQ <b>S</b> IQSYL   | YTASSLQSS         | QQSYST <b>P</b> RS          | 1.27E+06              | 7.19E-05 | 5.66E-11 | >10                            | 0.014 | 100% |
| eCC6.30.2     | KASGG <b>A</b> FSIY <b>S</b> IT | GIIP <b>I</b> RGTAN        | RDFRYCSSTRCYFWF                  | RASQ <b>S</b> IGSYL   | YTASSLQSS         | QQSYSTPRT                   | 1.46E+06              | 5.93E-05 | 4.06E-11 | >10                            | 0.016 | 100% |
| eCC6.30.3     | K <b>V</b> SGG <b>W</b> FSIYAIT | GIIP <b>I</b> QGTAN        | <b>L</b> DFRYCSSTRCYFWF          | RASQ <b>S</b> ISEYL   | YTASSLQSS         | QQSYSTPRT                   | 1.54E+06              | 1.15E-04 | 7.47E-11 | >10                            | 0.041 | 100% |
| eCC6.30.4     | KASGGT <b>F</b> DIYAIT          | GIIP <b>I</b> RGTAN        | RDFRYCSSTRCYFWF                  | RASQ <b>S</b> ISEYL   | <b>Y</b> RASSLQSS | QQSYSTPRT                   | 1.12E+06              | 2.78E-04 | 2.49E-10 | >10                            | 0.013 | 100% |
| eCC6.30.5     | KASGG <b>A</b> FSIYAIT          | GIIP <b>I</b> GTAN         | RDFRYC <b>E</b> STRCYFWF         | <b>H</b> ASQSISSYL    | YTASSLQSS         | QQSYSTPRT                   | 1.02E+06              | 1.13E-04 | 1.10E-10 | >10                            | 0.026 | 100% |
| eCC6.30.6     | KASGGTFSIY <b>A</b> L <b>T</b>  | GIIP <b>I</b> QGTAN        | RDFRYC <b>S</b> GTRCYFWF         | RASQ <b>S</b> ISTYL   | <b>Y</b> SASSLQSS | QQSYSTPRT                   | 1.09E+06              | 3.98E-04 | 3.64E-10 | >10                            | 0.013 | 100% |
| eCC6.30.7     | KASGGTFSIYAIT                   | <b>N</b> IIP <b>I</b> GTAN | <b>Y</b> DFRYCSSTRCYFWF          | RASQ <b>S</b> ISEYL   | <b>Y</b> QASSLQSS | <b>G</b> QSYSTPRT           | 1.40E+06              | 2.19E-04 | 1.56E-10 | >10                            | 0.015 | 100% |
| eCC6.30.8     | KASGG <b>P</b> FSIYAIT          | GIIP <b>I</b> RGTAN        | RDFRYCSSTRCYFWF                  | <b>Q</b> ASQSISSYL    | YTASSLQSS         | QQSYSTPRT                   | 1.16E+06              | 1.11E-04 | 9.57E-11 | >10                            | 0.010 | 100% |
| eCC6.30.9     | KASGGIFSIYAIT                   | <b>A</b> IIP <b>I</b> GTAN | RDFRYCSSTRCY <b>F</b> N <b>F</b> | RASQ <b>S</b> ISNYL   | YTASSLQSS         | QQSYSTPRT                   | 2.57E+06              | 2.02E-04 | 7.88E-11 | >10                            | 0.016 | 100% |
| eCC6.30.10    | KASGGT <b>F</b> AIYAIT          | <b>N</b> IIP <b>I</b> GTAN | RDFRYCSSTRCYFWF                  | RASQ <b>P</b> ISSYL   | YTASSLQSS         | QQSYSTPRT                   | 1.47E+06              | 4.29E-05 | 2.91E-11 | >10                            | 0.017 | 100% |
| eCC6.30.11    | KASGG <b>A</b> FSIYAIT          | GIIP <b>I</b> RGTAN        | RDFRYC <b>S</b> ETRCYFWF         | RASQ <b>D</b> ISSYL   | <b>Y</b> RASSLQSS | QQSYST <b>P</b> RS          | 2.71E+06              | 1.27E-04 | 4.71E-11 | >10                            | 0.025 | 100% |

1044 **Supplementary Table 3. CDR loop sequences, RBD binding affinity, and neutralization**  
1045 **potency of parental and engineered antibodies. Related to Fig.3.**

1046

1047 Summary table of parental CC12.1, CC6.33, CC6.30 and 35 engineered antibodies with sequences  
1048 of 6 CDR loops, binding affinity against SARS-CoV-2 RBD, SARS-CoV-1/2 neutralization potency  
1049 and maximum percentage of neutralization (MPN). Mutations of engineered antibodies at CDR  
1050 loops were highlighted in red. Antibodies were captured via Fc-capture to an anti-human IgG Fc  
1051 antibody and varying concentrations of SARS-CoV-2 RBD were injected using a multi-cycle  
1052 method. Association and dissociation rate constants calculated through a 1:1 Langmuir binding  
1053 model using the BIAevaluation software. Neutralization assay was performed using pseudotyped  
1054 SARS-CoV-1 and SARS-CoV-2 with Hela-hACE2 cell line. All antibodies were tested in duplicates.  
1055

| SPR against RBD |           | CC6.30   | eCC6.30.2 | REGN10933 | CC12.1   | eCC12.1.4 | eCC12.1.7 | LY-CoV16 | CC6.33   | eCC6.33.8 | REGN10987 |
|-----------------|-----------|----------|-----------|-----------|----------|-----------|-----------|----------|----------|-----------|-----------|
| Wuhan-1         | ka [1/Ms] | 2.52E+06 | 1.46E+06  | 3.48E+06  | 6.96E+05 | 8.21E+05  | 8.48E+05  | 1.30E+06 | 5.93E+04 | 1.74E+05  | 1.76E+06  |
|                 | kd [1/s]  | 4.30E-03 | 5.93E-05  | 4.31E-03  | 4.12E-03 | 2.35E-04  | 1.65E-04  | 1.87E-02 | 1.52E-02 | 4.25E-04  | 1.86E-02  |
|                 | KD [M]    | 1.71E-09 | 4.06E-11  | 1.24E-09  | 5.92E-09 | 2.86E-10  | 1.95E-10  | 1.51E-08 | 2.57E-07 | 2.44E-09  | 1.06E-08  |
| K417N           | ka [1/Ms] | 2.67E+06 | 1.01E+06  | 2.47E+06  | -        | 5.44E+05  | 6.07E+05  | -        | 2.20E+05 | 2.00E+05  | 3.73E+06  |
|                 | kd [1/s]  | 3.86E-03 | 6.68E-04  | 3.89E-02  | -        | 3.54E-03  | 3.01E-03  | -        | 1.12E-02 | 3.20E-04  | 3.76E-02  |
|                 | KD [M]    | 1.45E-09 | 6.60E-10  | 1.58E-08  | -        | 6.51E-09  | 4.97E-09  | -        | 5.07E-08 | 1.60E-09  | 1.08E-08  |
| K417T           | ka [1/Ms] | 3.19E+06 | 8.67E+05  | 3.15E+06  | -        | 5.11E+05  | 4.77E+05  | -        | 1.51E+05 | 2.49E+05  | 3.37E+06  |
|                 | kd [1/s]  | 2.03E-03 | 5.35E-04  | 4.85E-02  | -        | 9.31E-04  | 6.65E-04  | -        | 7.94E-03 | 6.10E-04  | 4.89E-02  |
|                 | KD [M]    | 6.36E-10 | 6.18E-10  | 1.54E-08  | -        | 1.82E-09  | 1.40E-09  | -        | 5.26E-08 | 2.45E-09  | 1.45E-08  |
| L452R           | ka [1/Ms] | -        | 2.11E+06  | 3.96E+06  | 4.80E+05 | 7.34E+05  | 8.78E+05  | 6.75E+05 | 2.01E+05 | 2.24E+05  | 1.56E+06  |
|                 | kd [1/s]  | -        | 7.74E-03  | 7.74E-03  | 2.40E-03 | 8.07E-04  | 4.96E-04  | 1.09E-02 | 6.33E-03 | 2.64E-04  | 1.71E-02  |
|                 | KD [M]    | -        | 3.68E-09  | 1.38E-09  | 5.01E-09 | 1.10E-09  | 5.66E-10  | 1.61E-08 | 3.10E-08 | 1.18E-09  | 1.10E-08  |
| E484K           | ka [1/Ms] | -        | -         | 2.03E+06  | 2.60E+06 | 8.41E+05  | 1.04E+06  | 4.41E+05 | 1.98E+05 | 1.80E+05  | 1.68E+06  |
|                 | kd [1/s]  | -        | -         | 4.07E-02  | 4.52E-03 | 2.02E-04  | 1.20E-04  | 1.20E-02 | 8.75E-03 | 2.82E-04  | 1.79E-02  |
|                 | KD [M]    | -        | -         | 2.00E-08  | 1.74E-09 | 2.41E-10  | 1.15E-10  | 2.72E-08 | 4.43E-08 | 1.57E-09  | 1.06E-08  |
| E484Q           | ka [1/Ms] | -        | 1.82E+06  | 2.46E+06  | 4.02E+05 | 9.23E+05  | 1.07E+06  | 9.50E+05 | 1.83E+05 | 1.87E+05  | 1.17E+06  |
|                 | kd [1/s]  | -        | 4.51E-03  | 1.70E-02  | 1.38E-03 | 5.37E-04  | 3.94E-04  | 1.56E-02 | 8.90E-03 | 2.55E-04  | 1.87E-03  |
|                 | KD [M]    | -        | 2.48E-09  | 7.00E-09  | 3.43E-09 | 5.82E-10  | 3.67E-10  | 1.64E-08 | 4.87E-08 | 1.36E-09  | 1.61E-09  |
| Alpha           | ka [1/Ms] | 2.62E+06 | 9.82E+05  | 2.61E+06  | 3.58E+05 | 8.08E+05  | 8.86E+05  | 8.22E+05 | 2.20E+05 | 1.96E+05  | 1.66E+06  |
|                 | kd [1/s]  | 6.91E-03 | 6.17E-04  | 3.36E-03  | 5.16E-03 | 4.43E-04  | 2.37E-03  | 7.01E-02 | 7.45E-03 | 2.67E-04  | 1.10E-02  |
|                 | KD [M]    | 2.64E-09 | 6.28E-10  | 1.29E-09  | 1.44E-08 | 5.48E-10  | 2.67E-09  | 8.53E-08 | 3.39E-08 | 1.36E-09  | 6.63E-09  |
| Beta            | ka [1/Ms] | -        | -         | -         | -        | 1.61E+05  | 2.18E+05  | -        | 1.26E+05 | 1.10E+05  | 7.99E+05  |
|                 | kd [1/s]  | -        | -         | -         | -        | 8.70E-03  | 4.50E-02  | -        | 1.14E-02 | 2.78E-04  | 1.25E-02  |
|                 | KD [M]    | -        | -         | -         | -        | 5.42E-08  | 2.07E-07  | -        | 9.05E-08 | 2.53E-09  | 1.56E-08  |
| Gamma           | ka [1/Ms] | -        | -         | 1.17E+05  | -        | 7.15E-05  | 1.02E+06  | -        | 1.41E+05 | 1.96E+05  | 2.84E+06  |
|                 | kd [1/s]  | -        | -         | 1.23E-03  | -        | 9.00E-03  | 3.62E-02  | -        | 1.07E-02 | 2.63E-04  | 1.52E-02  |
|                 | KD [M]    | -        | -         | 1.05E-08  | -        | 1.26E-08  | 3.56E-08  | -        | 7.57E-08 | 1.35E-09  | 5.33E-09  |
| Kappa           | ka [1/Ms] | -        | -         | 3.18E+06  | 3.80E+05 | 8.57E+05  | 1.19E+06  | 1.27E+06 | 1.18E+05 | 2.22E+05  | 2.49E+06  |
|                 | kd [1/s]  | -        | -         | 3.17E-02  | 1.36E-03 | 6.49E-04  | 2.12E-04  | 1.83E-02 | 1.22E-02 | 2.69E-04  | 1.72E-02  |
|                 | KD [M]    | -        | -         | 9.97E-09  | 3.59E-09 | 7.57E-10  | 1.79E-10  | 1.44E-08 | 1.03E-07 | 1.22E-09  | 6.92E-09  |

1056

1057

1058 **Supplementary Table 4. Surface plasmon resonance of SARS-CoV-2 nAbs against RBD**  
 1059 **variants. Related to Fig.4.**

1060

1061 Antibodies were captured via Fc-capture to an anti-human IgG Fc antibody and varying  
 1062 concentrations of Wuhan-1 RBD or SARS-CoV-2 RBD variants were injected using a multi-cycle  
 1063 method. Association and dissociation rate constants calculated through a 1:1 Langmuir binding  
 1064 model using the BIAevaluation software. Antibodies that did not bind to RBD variants or their binding  
 1065 curves did not fit into the model were shown as no values in the table.

**S RBD N343Q (Wuhan-1)**

| Tile Number                                                               | Tile 1             | Tile 2             |
|---------------------------------------------------------------------------|--------------------|--------------------|
| Positions                                                                 | 333-436            | 437-537            |
| Number of Designed Mutations                                              | 1120               | 1260               |
| <hr/>                                                                     |                    |                    |
| <i>E. coli</i> transformants Obtained from Nicking Saturation Mutagenesis | 5.0E+05            | 1.5E+06            |
| Yeast transformants Obtained from Homologous Recombination                | 8.0E+05            | 1.0E+06            |
| <hr/>                                                                     |                    |                    |
| Library Coverage Per Tile                                                 | 97%<br>(1089/1120) | 92%<br>(1161/1260) |
| Overall Library Coverage                                                  | 94.5% (2250/2380)  |                    |

1066

1067

1068

1069 **Supplementary Table 5. S RBD Single saturation mutagenesis library coverage statistics.**

1070 **Related to Fig.5.**
